# Supplementary material for: Genomic history of the origin and domestication of common bean unveils its closest sister species
Source: PubMed Central journal article supplement (PMC5370463; doi:10.1186/s13059-017-1190-6), 2017-03-29
Supplement: 13059_2017_1190_MOESM1_ESM.pdf [file 13059_2017_1190_MOESM1_ESM.pdf]

# Genomic history of the origin and domestication of common bean unveils its closest sister species

Additional file 1.

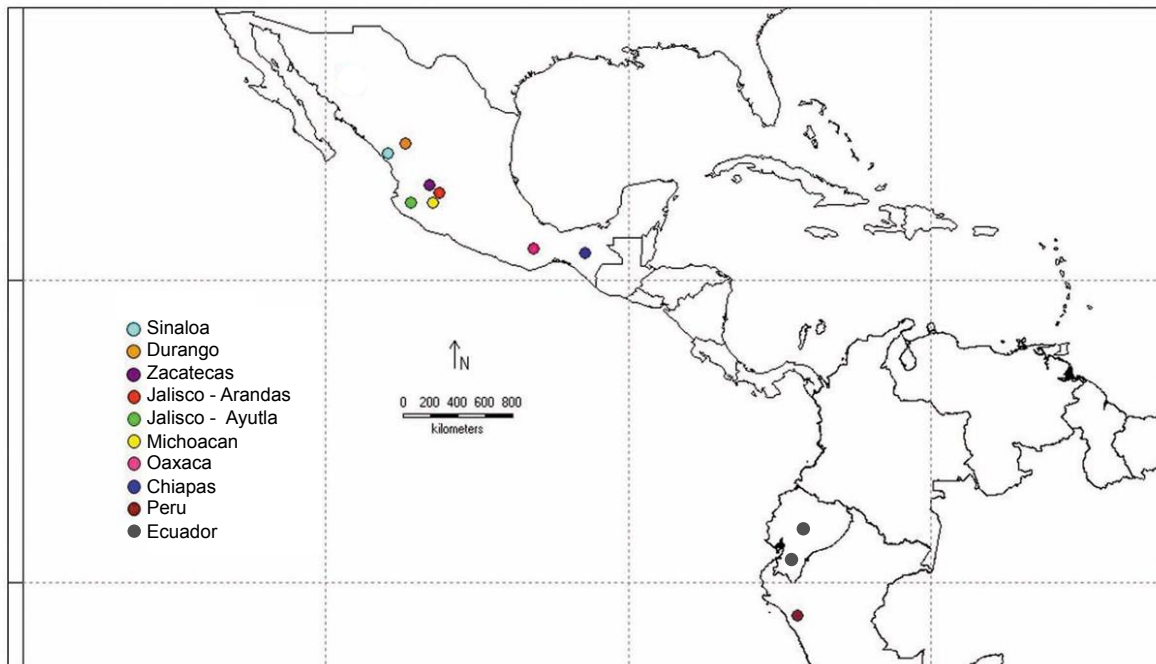

Figure S1. Geographic origin of wild *P. vulgaris* accessions.

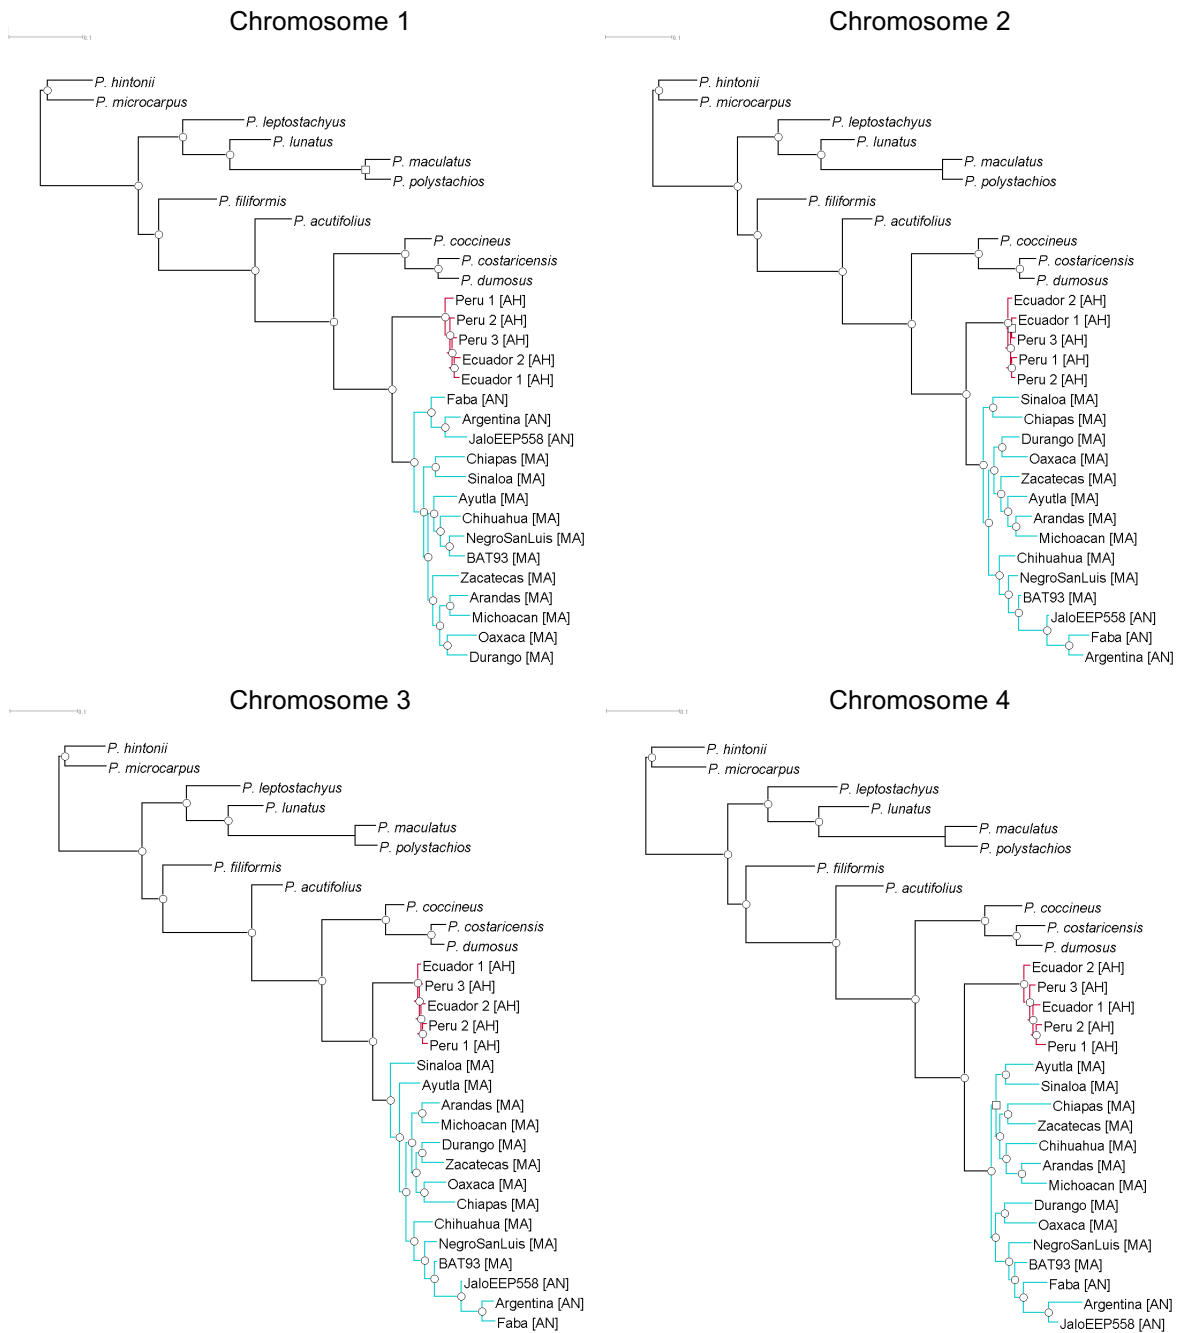

**Figure S2.** Phylogenetic trees produced using the ML method and SH-aLRT branch support implemented in PhyML, considering non-unique SNPs from chromosomes 1 to 4 according to the pseudoassembly of *P. vulgaris* cv. BAT93 against *P. vulgaris* G19833. Branch support: aLRT > 0.95, circles; aLRT [0.75-0.95], squares.

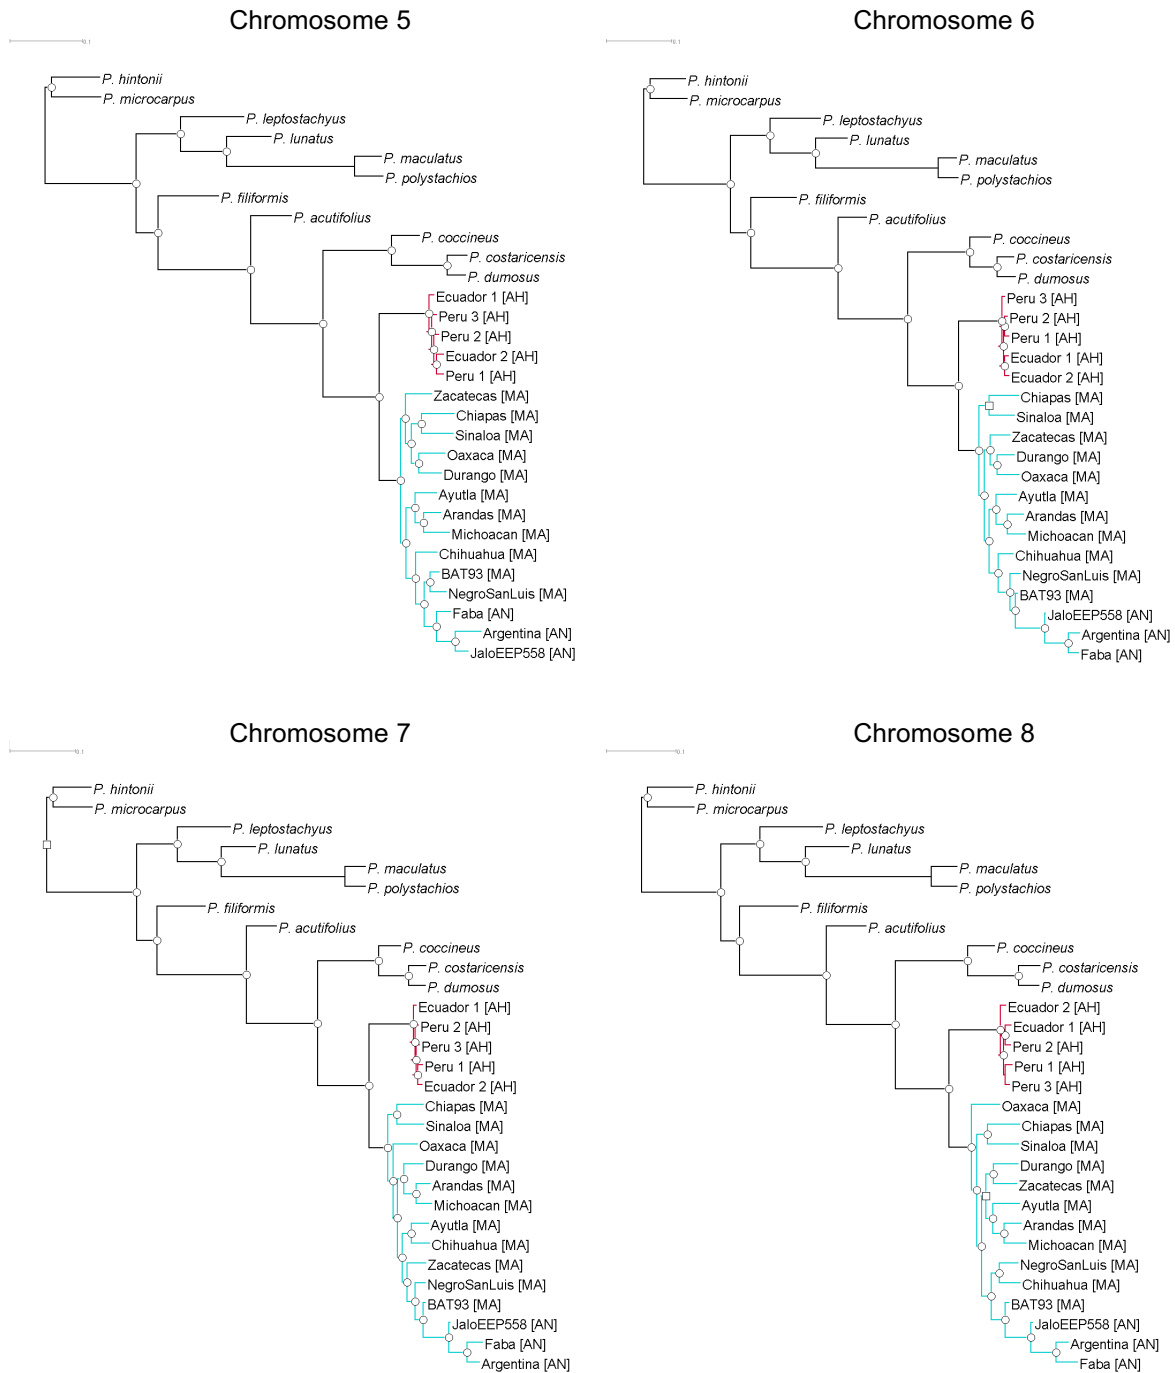

**Figure S3.** Phylogenetic trees produced using the ML method and SH-aLRT branch support implemented in PhyML, considering non-unique SNPs from chromosomes 5 to 8 according to the pseudoassembly of *P. vulgaris* cv. BAT93 against *P. vulgaris* G19833. Branch support: aLRT > 0.95, circles; aLRT [0.75-0.95], squares.

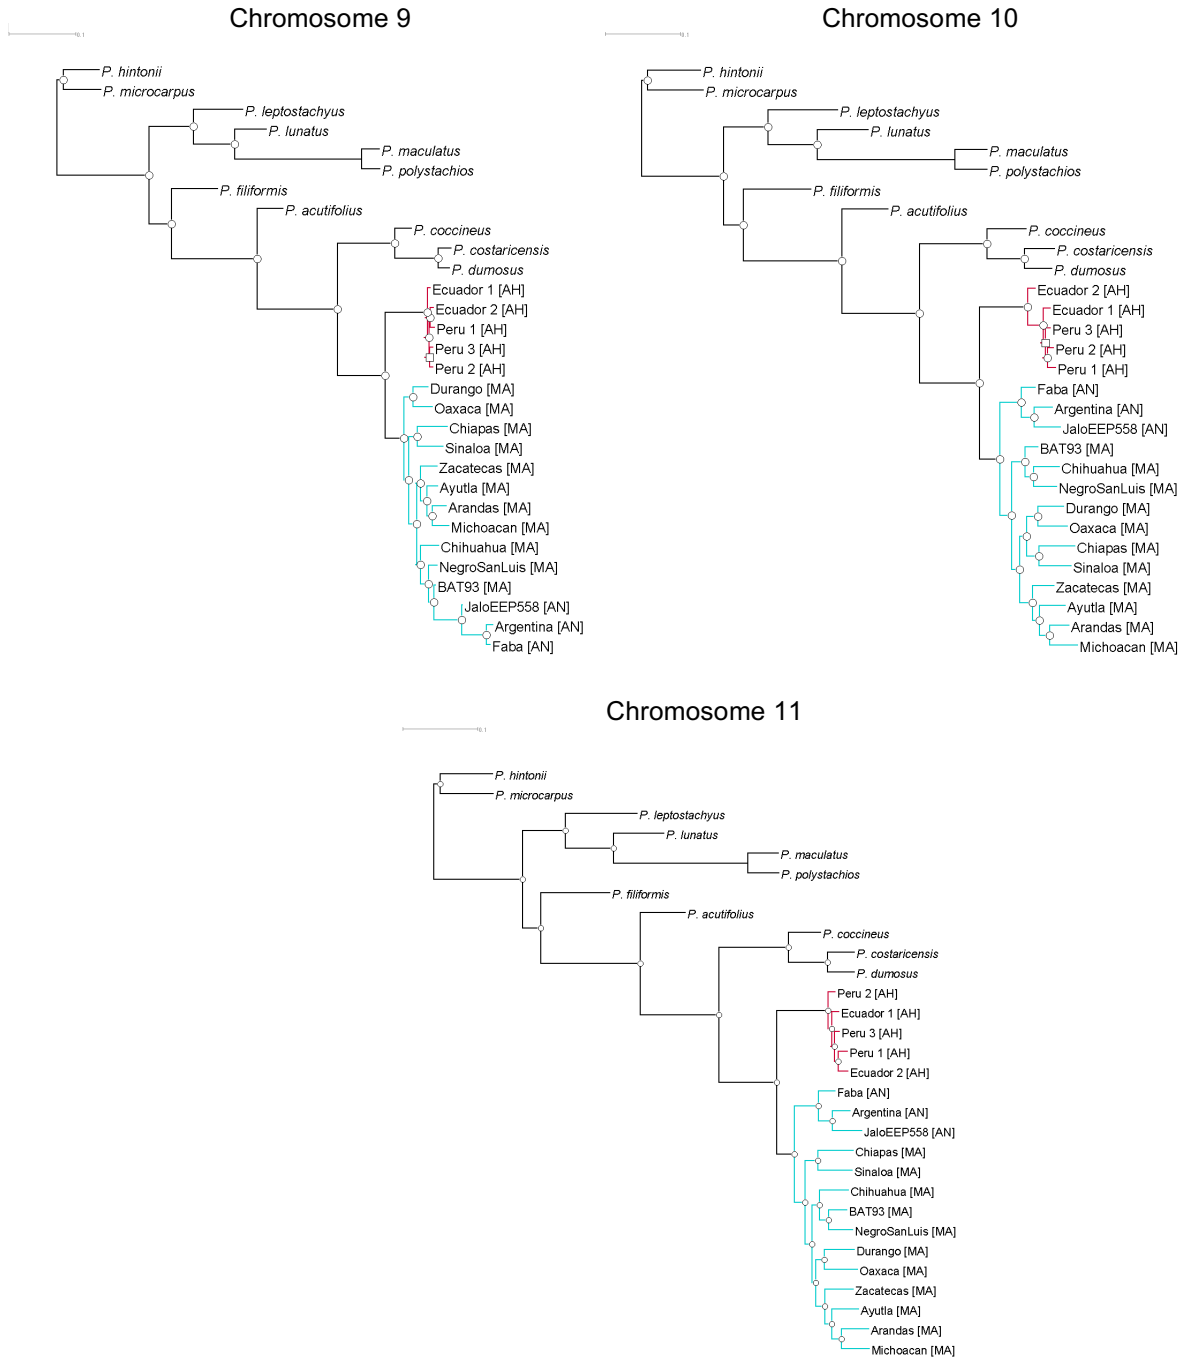

**Figure S4.** Phylogenetic trees produced using the ML method and SH-aLRT branch support implemented in PhyML, considering non-unique SNPs from chromosomes 9 to 11 according to the pseudoassembly of *P. vulgaris* cv. BAT93 against *P. vulgaris* G19833. Branch support: aLRT > 0.95, circles; aLRT [0.75-0.95], squares.

a.

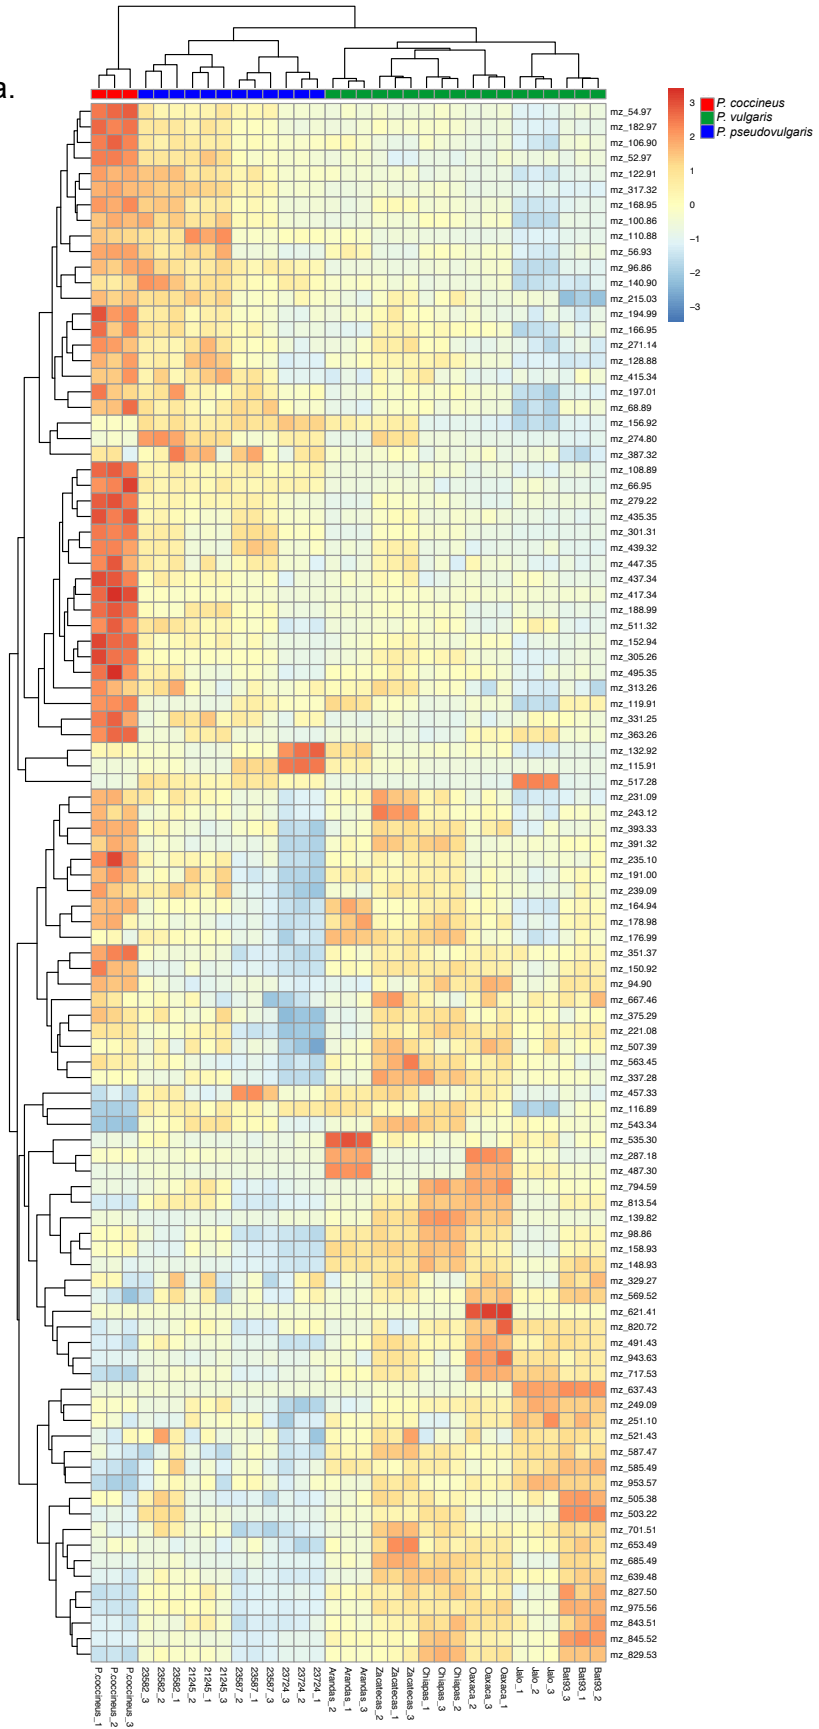

b.

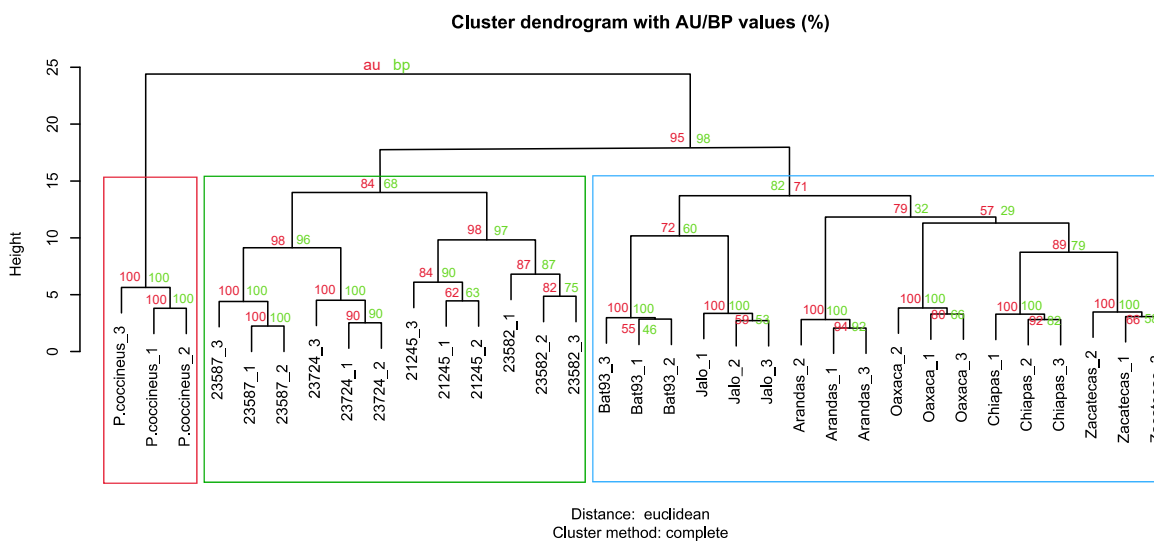

**Figure S11.** Metabolic profile of *Phaseolus* accessions considering the top 100 most abundant metabolites. a. Hierarchical clustering/bootstrap tree of *Phaseolus* accessions; AU (Approximately Unbiased) and bootstrap probabilities are highlighted in red and green, respectively. Coloured boxed enclose the independent clades of *P. coccineus* (red), AH - *P. pseudovulgaris* accessions (green) and *P. vulgaris* (blue). b. Metabolic heatmap and clustering of the accessions.

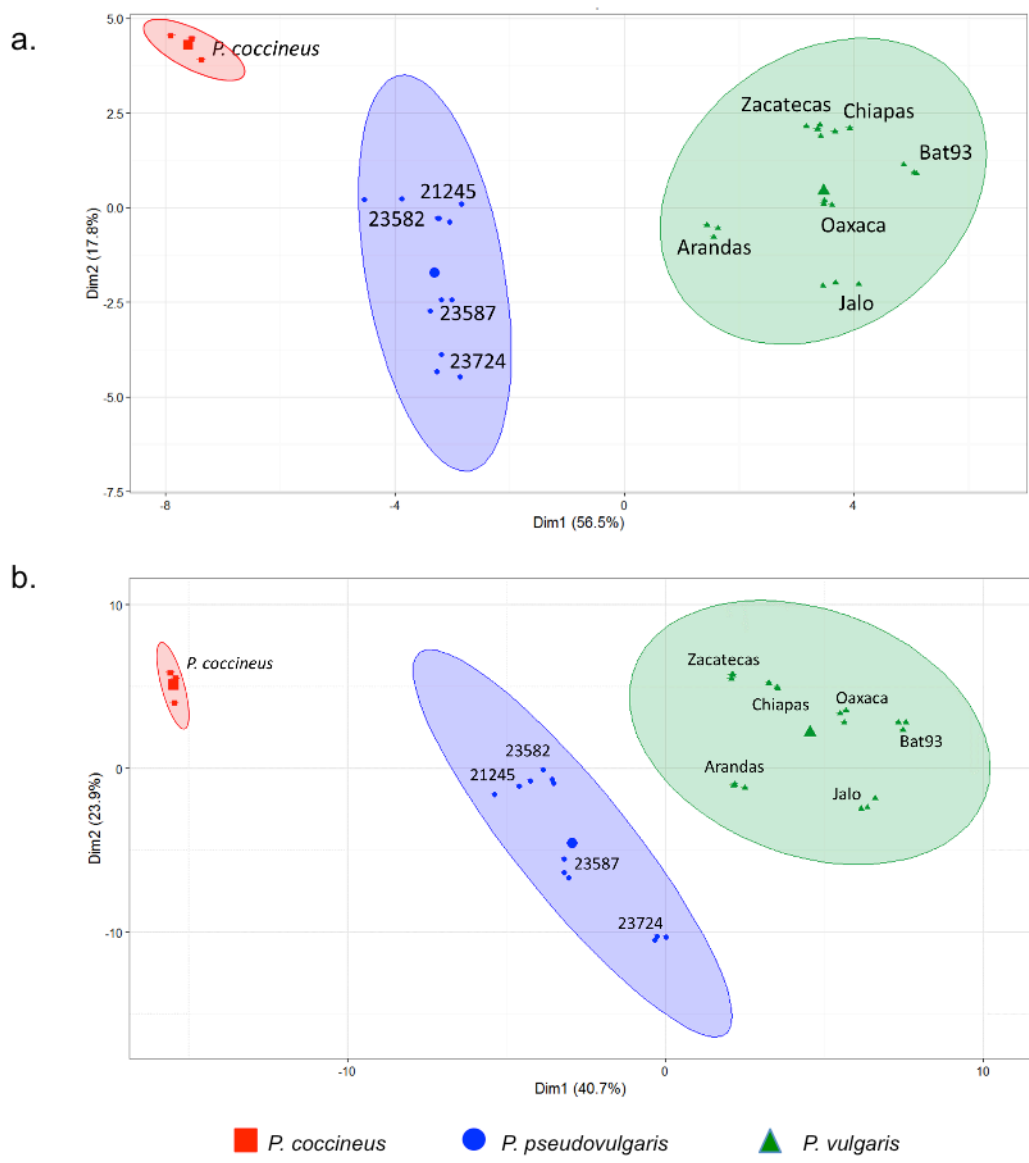

**Figure S12.** Principal component analysis of *Phaseolus* accessions considered in the metabolomics fingerprinting. a. PCA using the 30 most informative metabolites obtained following a machine learning approach. b. PCA using the 100 most abundant metabolites in the screening.

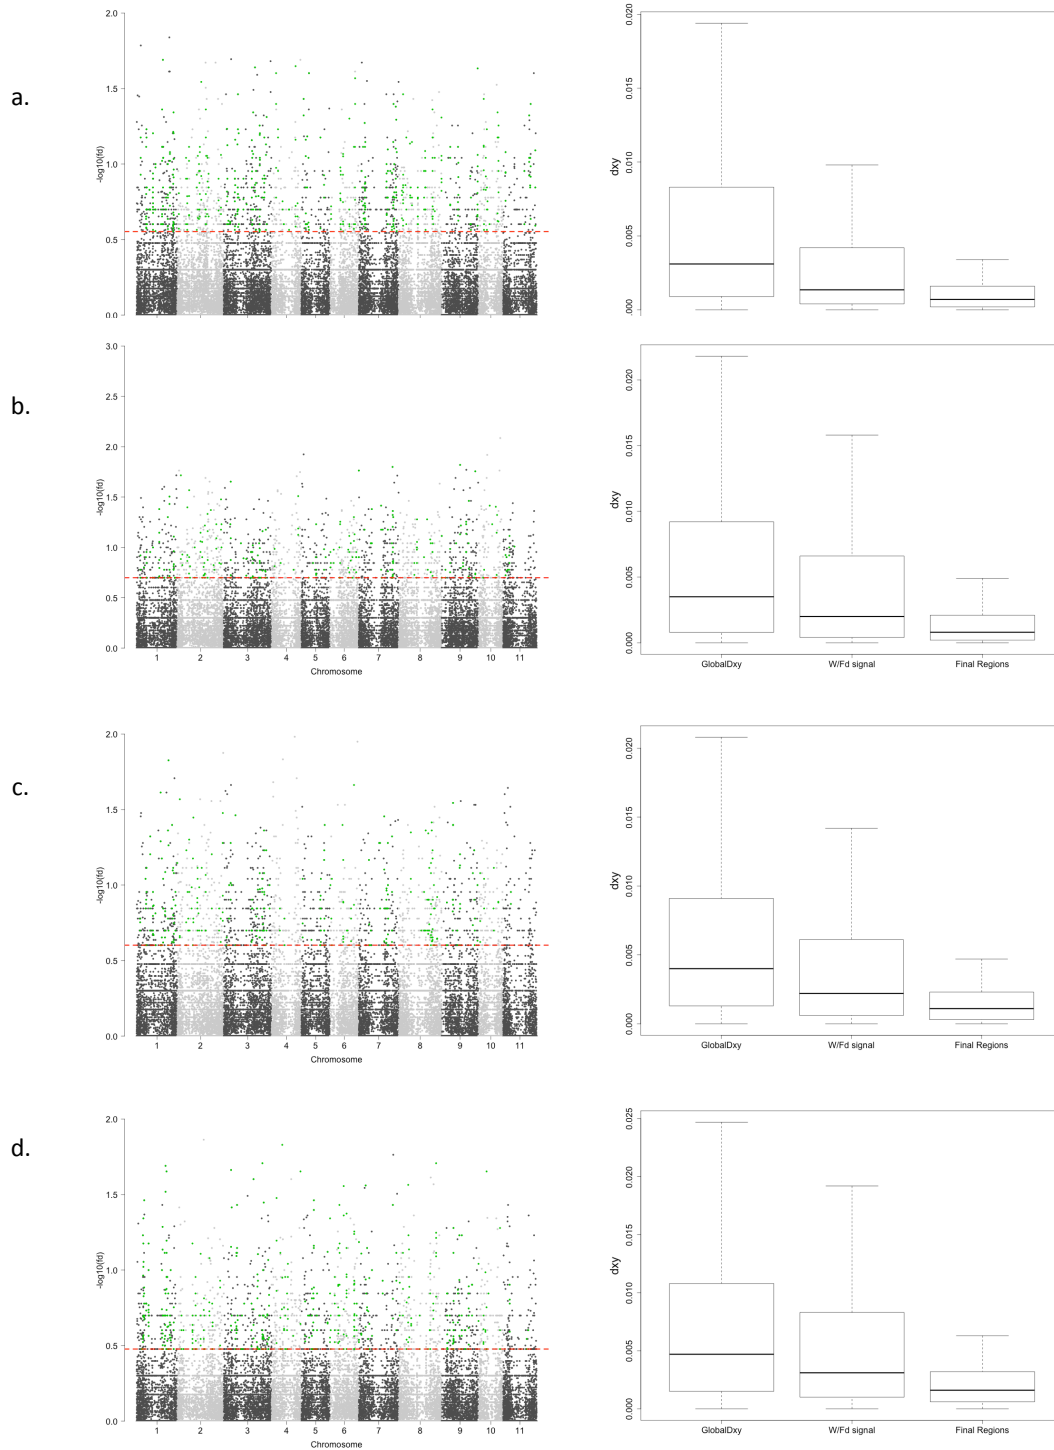

**Figure S13.** Introgression signal between wild *P. vulgaris* subpopulations.  $f_d$  values in 5kb non-overlapping windows of each chromosome are represented in Manhattan plots on left panels; the red threshold lines show the top 5%  $f_d$  outliers in each comparison, and strong signals of introgression ( $f_d + d_{XY}$ ) are highlighted in green. The directionality of genomic flux corresponds to: North towards West (a), South towards North (b), South towards West (c), North towards Center (d). Absolute genetic divergence ( $d_{XY}$ ) calculated at the genome-wide scale (left), in  $f_d$  5% outliers (middle) and regions with introgression signal ( $f_d + d_{XY}$ , right) are shown in boxplots on the right panel of each comparison.



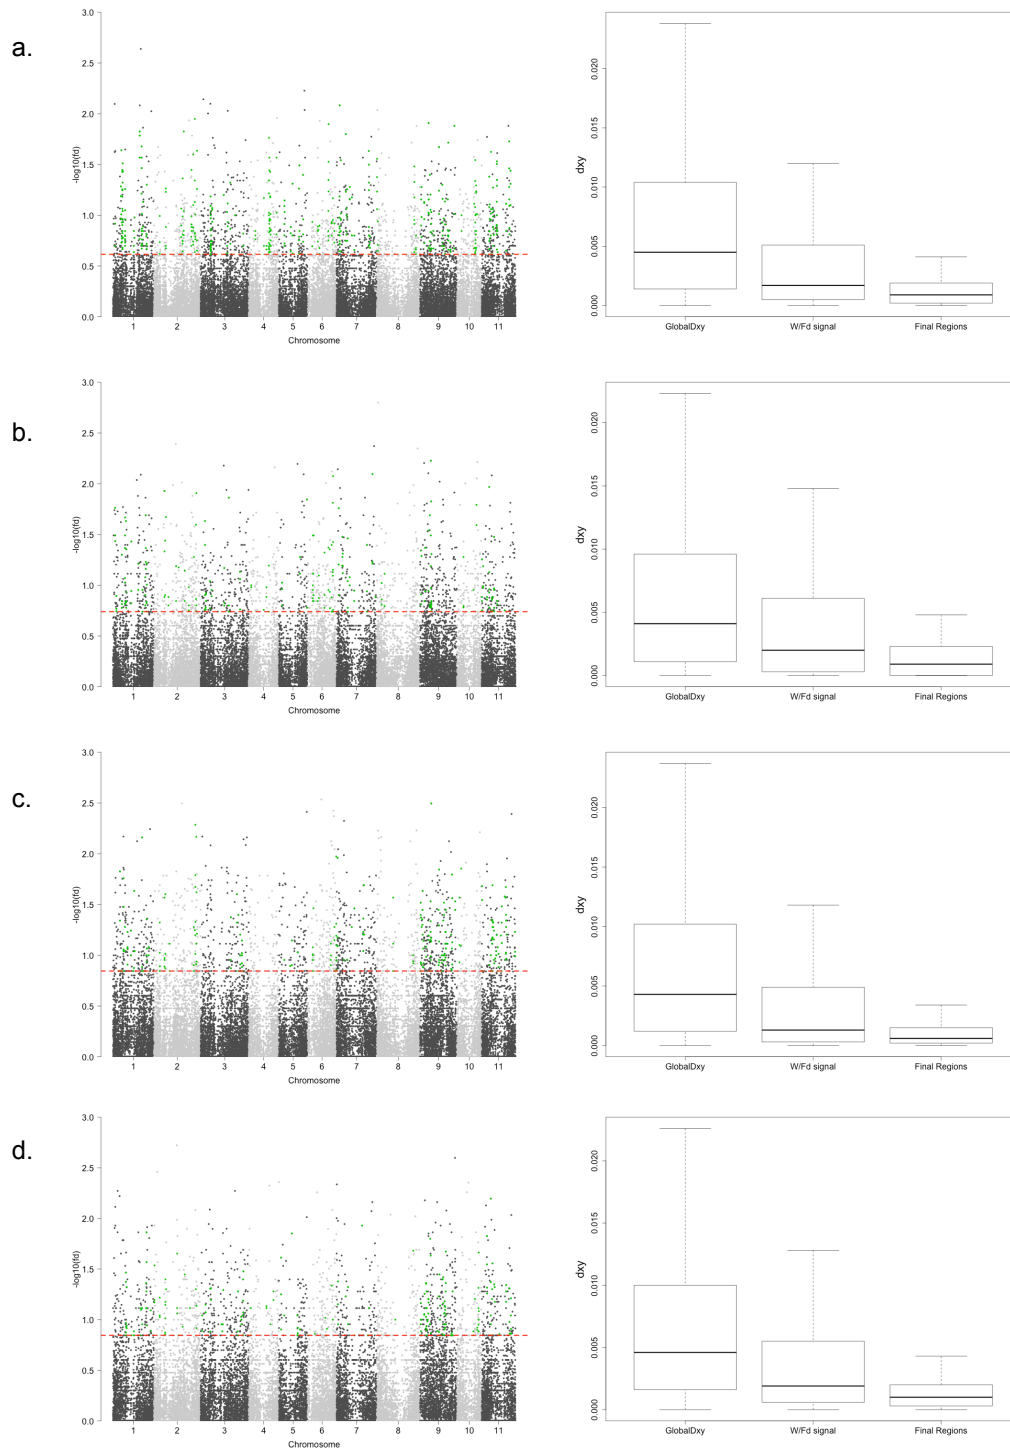

**Figure S14.** Introgression signal between wild and domesticated (DMA) *P. vulgaris* subpopulations.  $f_d$  values in 5kb non-overlapping windows of each chromosome are represented in Manhattan plots on left panels; the red threshold lines show the top 5%  $f_d$  outliers in each comparison, and strong signals of introgression ( $f_d + d_{XY}$ ) are highlighted in green. The directionality of genomic flux corresponds to: North towards DMA (a), South towards DMA (b), Center towards DMA (c), West towards DMA (d). Absolute genetic divergence ( $d_{XY}$ ) calculated at the genome-wide scale (left), in  $f_d$  5% outliers (middle) and regions with introgression signal ( $f_d + d_{XY}$ , right) are shown in boxplots on the right panel of each comparison.

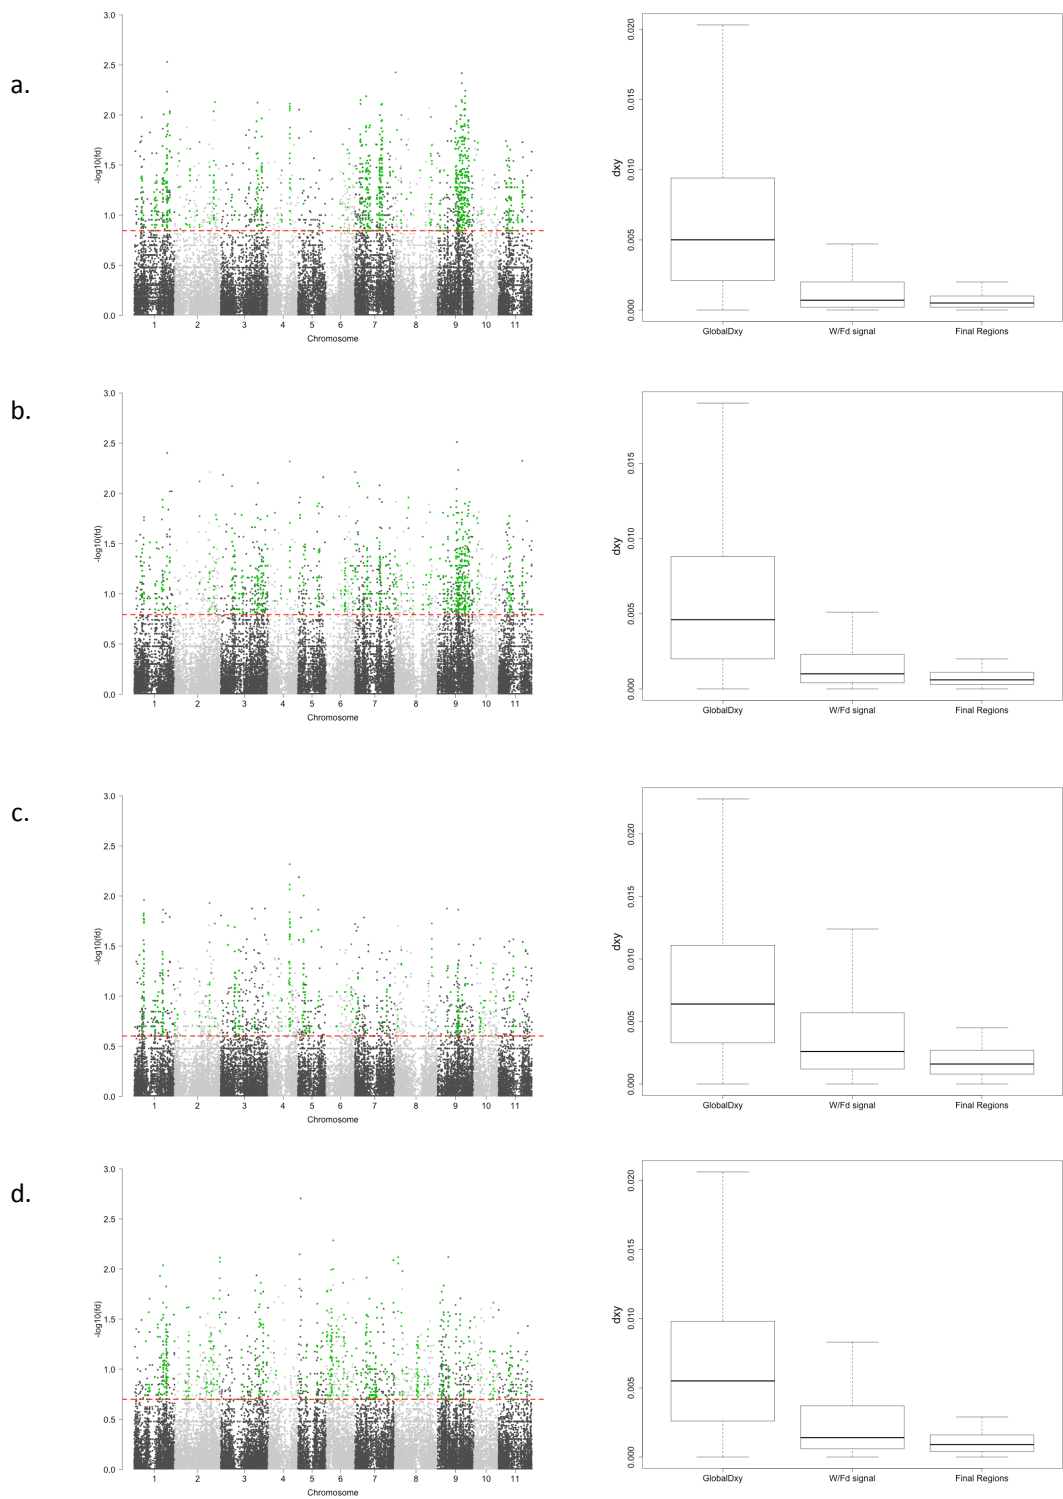

**Figure S15.** Introgression signal between domesticated (DMA) and wild *P. vulgaris* subpopulations.  $f_d$  values in 5kb non-overlapping windows of each chromosome are represented in Manhattan plots on left panels; the red threshold lines show the top 5%  $f_d$  outliers in each comparison, and strong signals of introgression ( $f_d + d_{XY}$ ) are highlighted in green. The directionality of genomic flux corresponds to: DMA towards Center (a), DMA towards West (b), DMA towards North (c), DMA towards South (d). Absolute genetic divergence ( $d_{XY}$ ) calculated at the genome-wide scale (left), in  $f_d$  5% outliers (middle) and regions with introgression signal ( $f_d + d_{XY}$ , right) are shown in boxplots on the right panel of each comparison.

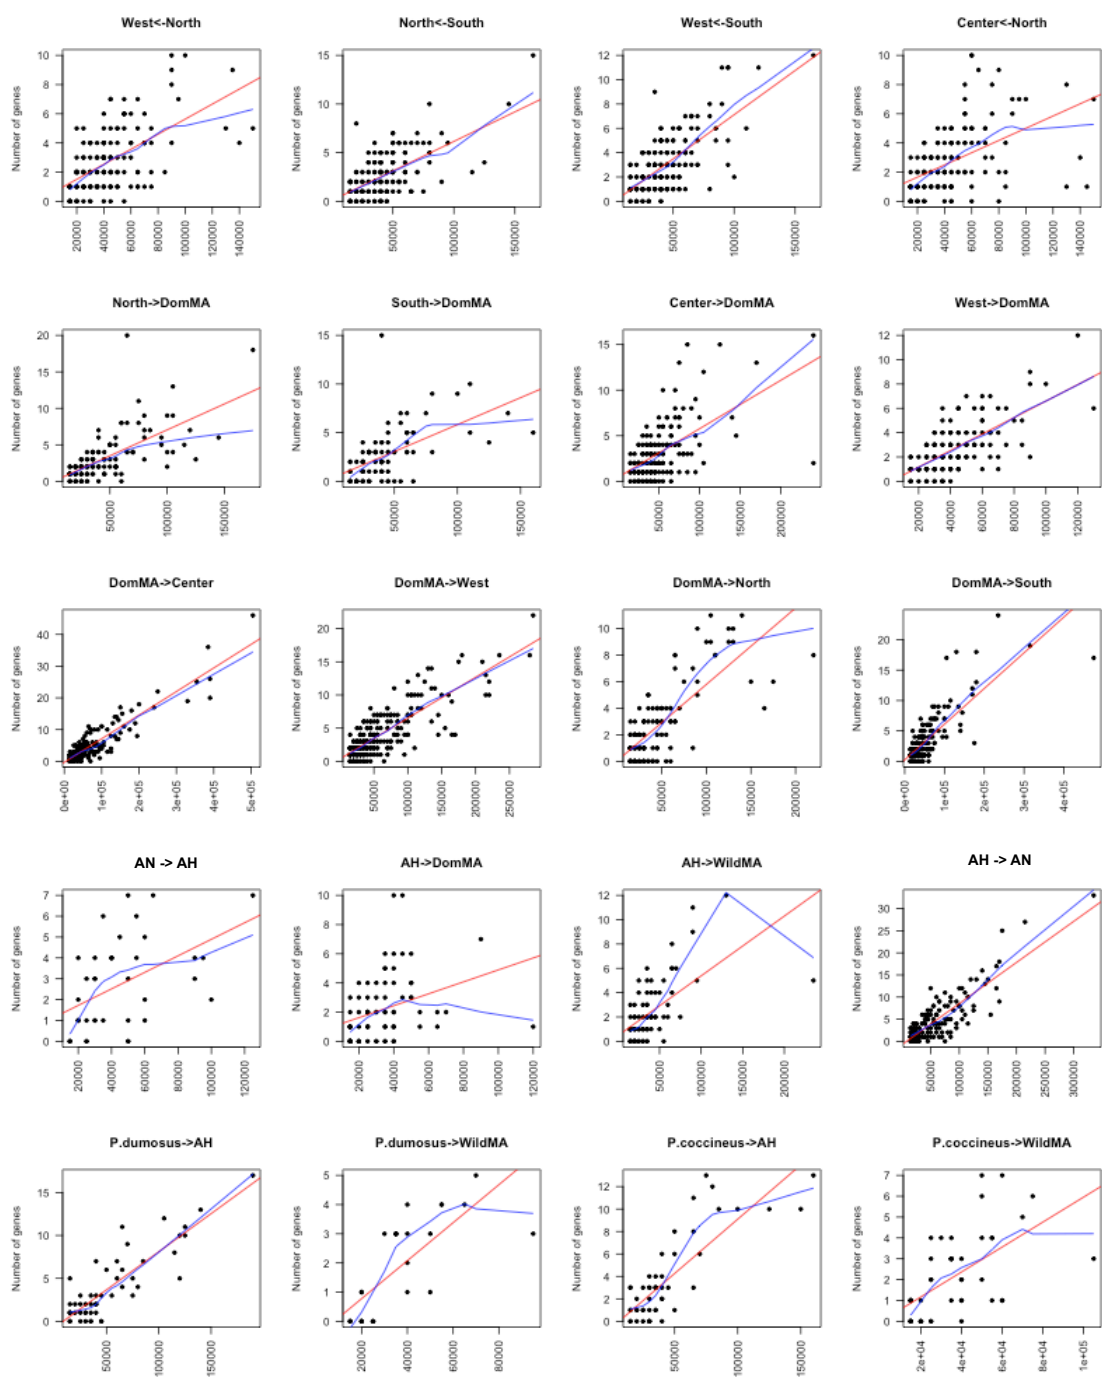

**Figure S16.** Introgressed PCG. The number of genes encoded in each introgressed block is represented in scatter plots. Coloured lines: linear (red) and local (blue) regressions.

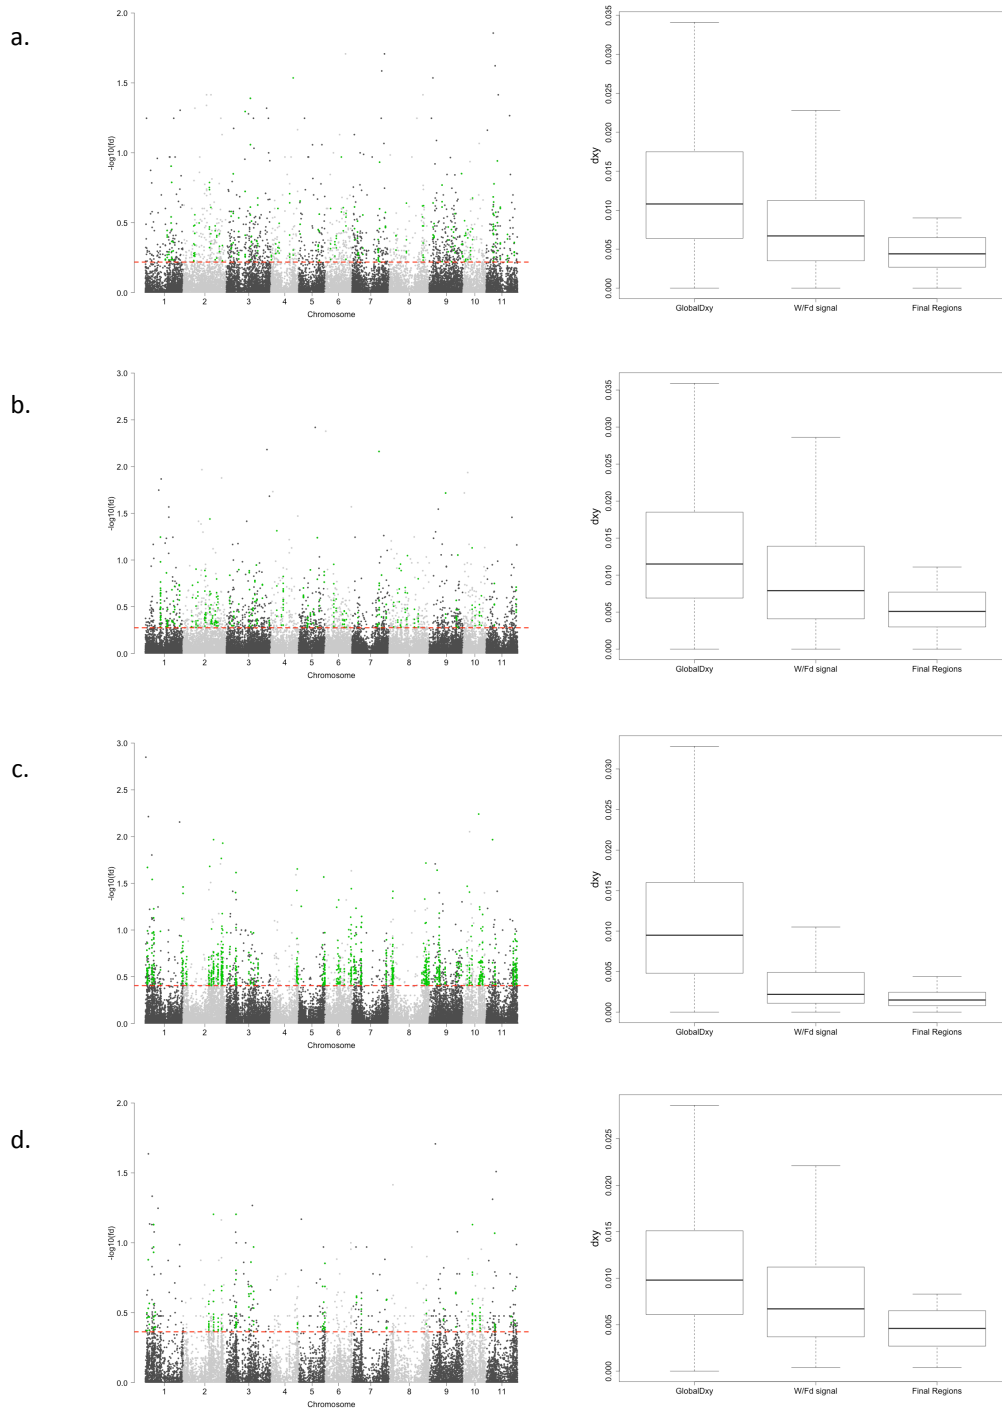

**Figure S17.** Introgression signal between *P. pseudovulgaris* and *P. vulgaris* subpopulations.  $f_d$  values in 5kb non-overlapping windows of each chromosome are represented in Manhattan plots on left panels; the red threshold lines show the top 5%  $f_d$  outliers in each comparison, and strong signals of introgression ( $f_d + d_{XY}$ ) are highlighted in green. The directionality of genomic flux corresponds to: AH towards DMA (a), AH towards WMA (b), AH towards AND (c), AN towards AH (d). Absolute genetic divergence ( $d_{XY}$ ) calculated at the genome-wide scale (left), in  $f_d$  5% outliers (middle) and regions with introgression signal ( $f_d + d_{XY}$ , right) are shown in boxplots on the right panel of each comparison.

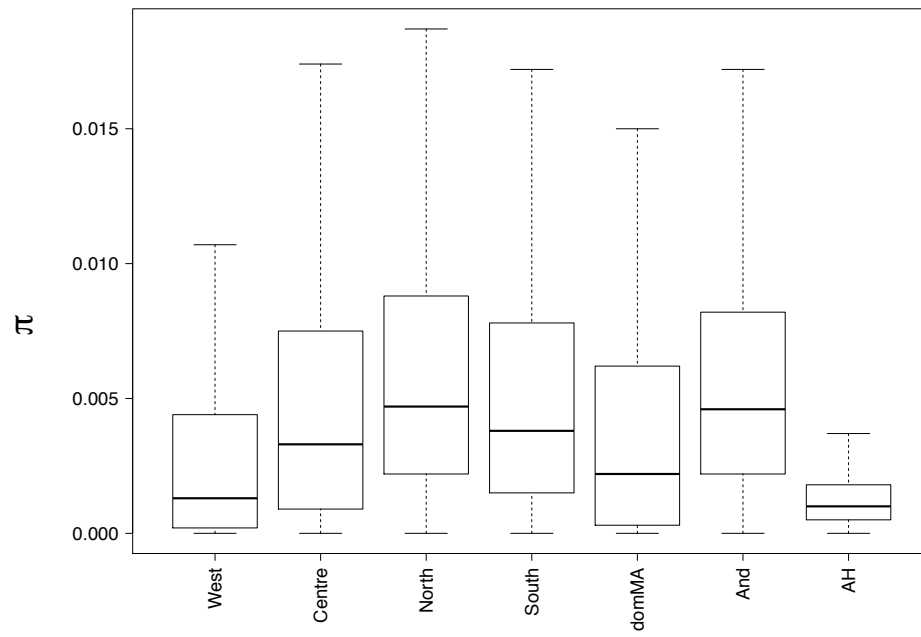

**Figure S18.** Genome-wide nucleotide diversity ( $\pi$ ) across *P. vulgaris* subpopulations.

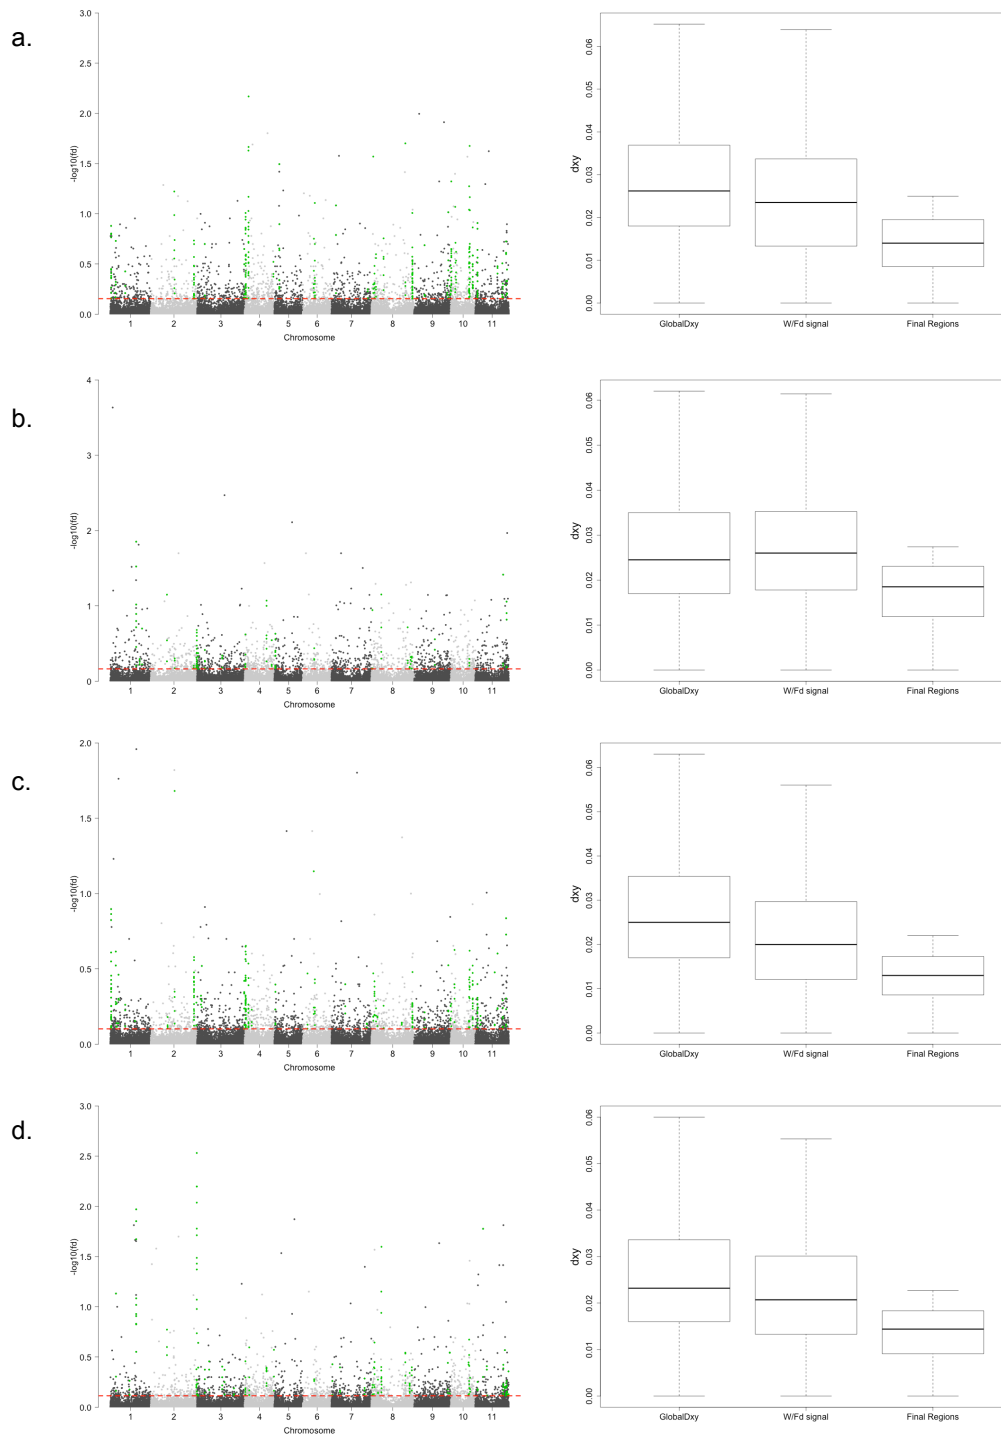

**Figure S19.** Introgression signal between *Phaseolus* spp. and *P. vulgaris* / *P. pseudovulgaris* subpopulations.  $f_d$  values in 5kb non-overlapping windows of each chromosome are represented in Manhattan plots on left panels; the red threshold lines show the top 5%  $f_d$  outliers in each comparison, and strong signals of introgression ( $f_d + d_{XY}$ ) are highlighted in green. The directionality of genomic flux corresponds to: *P. dumosus*/*P. costaricensis* towards AH (a), *P. dumosus*/*P. costaricensis* towards WMA (b), *P. coccineus* towards AH (c), *P. coccineus* towards WMA (d). Absolute genetic divergence ( $d_{XY}$ ) calculated at the genome-wide scale (left), in  $f_d$  5% outliers (middle) and regions with introgression signal ( $f_d + d_{XY}$ , right) are shown in boxplots on the right panel of each comparison.

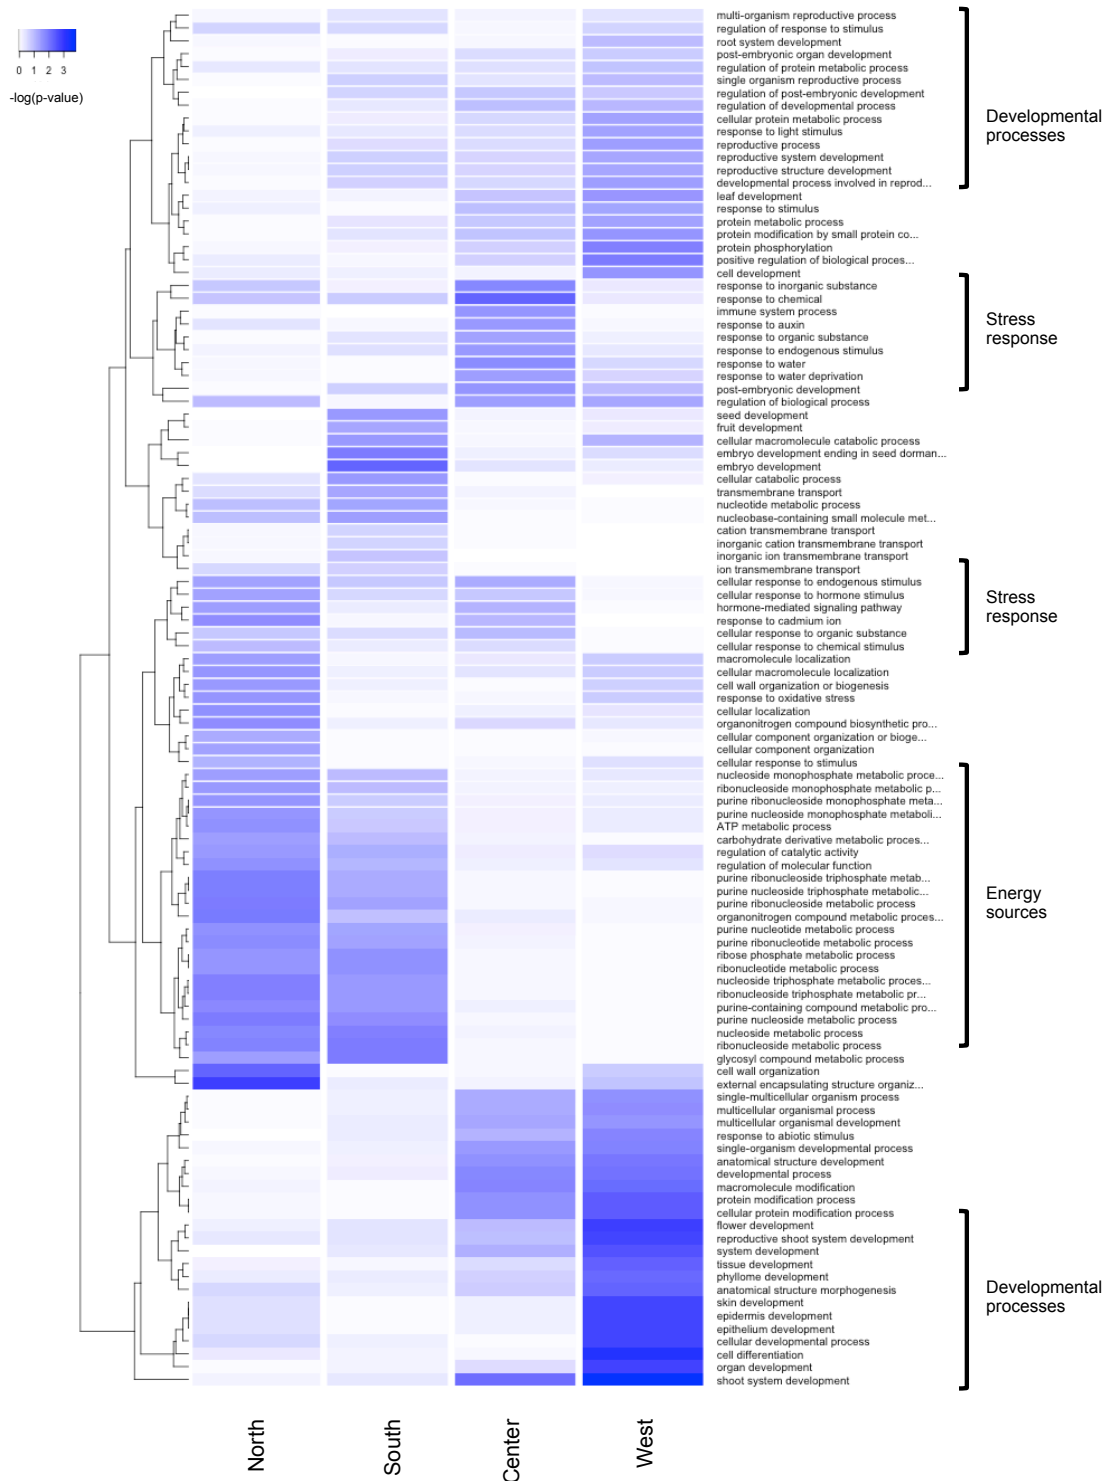

**Figure S20.** Enriched categories among PCGs introgressed from wild MA subpopulations into domesticated genotypes.

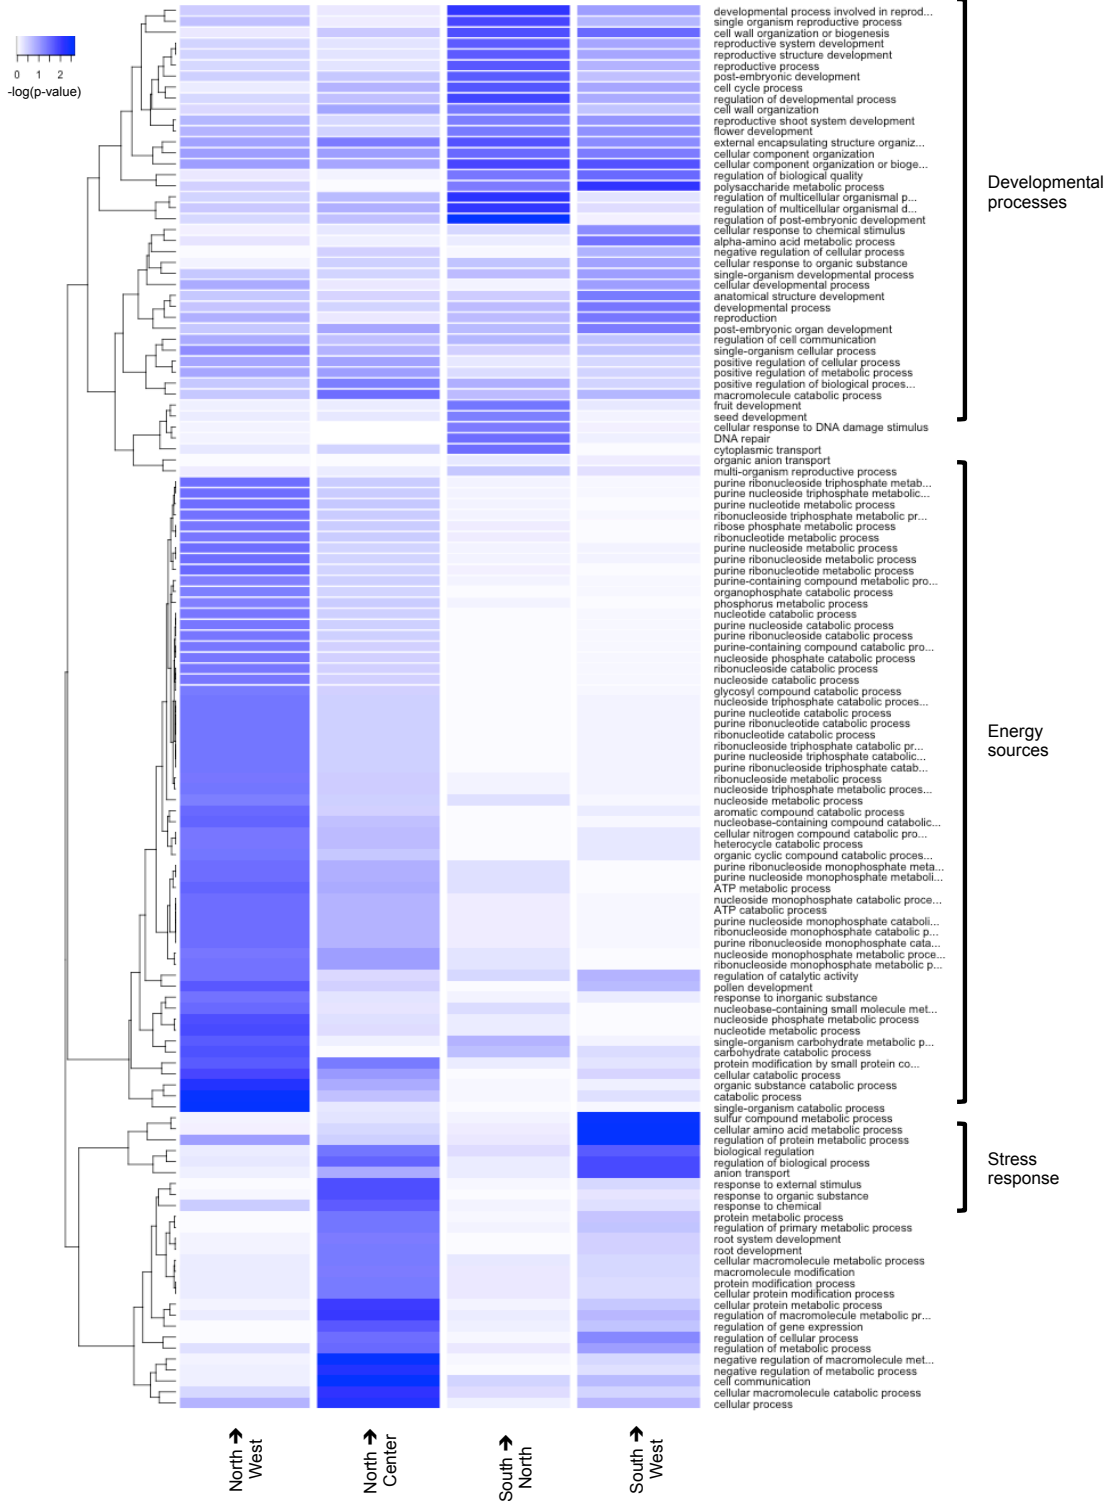

Figure S21. Enriched categories among PCGs introgressed between wild MA subpopulations.
