# Supplementary material for: Genomic history of the origin and domestication of common bean unveils its closest sister species
Source: PubMed Central journal article supplement (PMC5370463; doi:10.1186/s13059-017-1190-6), 2017-03-29
Supplement: 13059_2017_1190_MOESM2_ESM.pdf [file 13059_2017_1190_MOESM2_ESM.pdf]

# Genomic history of the origin and domestication of common bean unveils its closest sister species

## Additional file 2.

**Table S1.** Plant material.

| Species                 | Clade | Group         | ID                       | Country        | State/ Province                      | Gene pool | Altitude (m) | 100 seed weight (g) |
|-------------------------|-------|---------------|--------------------------|----------------|--------------------------------------|-----------|--------------|---------------------|
| <i>P. vulgaris</i>      | B     | Vulgaris      | G24392                   | Mexico         | Jalisco/ Arandas                     | MA        | 2020         | 5.0                 |
| <i>P. vulgaris</i>      | B     | Vulgaris      | G24377                   | Mexico         | Michoacan/<br>Cojumatlan             | MA        | 1700         | 4.0                 |
| <i>P. vulgaris</i>      | B     | Vulgaris      | G50368                   | Mexico         | Oaxaca/<br>Tlacolula De<br>Matamoros | MA        | 1480         | 6.8                 |
| <i>P. vulgaris</i>      | B     | Vulgaris      | G23551                   | Mexico         | Sinaloa/<br>Concordia                | MA        | 710          | 4.2                 |
| <i>P. vulgaris</i>      | B     | Vulgaris      | G12967                   | Mexico         | Jalisco/ Ayutla                      | MA        | -            | 5.0                 |
| <i>P. vulgaris</i>      | B     | Vulgaris      | G23463                   | Mexico         | Chihuahua/<br>Yepachic               | MA        | 1530         | 9.4                 |
| <i>P. vulgaris</i>      | B     | Vulgaris      | G23550                   | Mexico         | Zacatecas/<br>Moyahua De E.          | MA        | 1700         | 6.3                 |
| <i>P. vulgaris</i>      | B     | Vulgaris      | G24594                   | Mexico         | Chiapas/ Ixtapa                      | MA        | 1400         | 5.4                 |
| <i>P. vulgaris</i>      | B     | Vulgaris      | G23556                   | Mexico         | Durango/Durango                      | MA        | 1860         | 8.5                 |
| <i>P. vulgaris</i>      | B     | Vulgaris      | G23939 Negro<br>San Luis | Mexico         | -                                    | MA        |              | > 20.0              |
| <i>P. vulgaris</i>      | B     | Vulgaris      | Faba Andecha             | Spain          | -                                    | AND       |              | 100.0               |
| <i>P. vulgaris</i>      | B     | Vulgaris      | Jalo EEP558<br>G09603    | Brazil         | Minas Gerais/<br>Patos De Minas      | AND       | -            | 41.0                |
| <i>P. vulgaris</i>      | B     | Vulgaris      | G19901                   | Argentina      | Tucuman/ El<br>Mollar                | AND       | 1900         | 9.0                 |
| <i>P. vulgaris</i>      | B     | Vulgaris      | G21244                   | Peru (1)       | Cajamarca/ San<br>Pablo              | AH        | 2020         | 9.0                 |
| <i>P. vulgaris</i>      | B     | Vulgaris      | G21245                   | Peru (2)       | Cajamarca/ San<br>Miguel             | AH        | 1790         | 10.5                |
| <i>P. vulgaris</i>      | B     | Vulgaris      | G23587                   | Peru (3)       | Cajamarca/<br>Chota                  | AH        | 1250         | 9.0                 |
| <i>P. vulgaris</i>      | B     | Vulgaris      | G23724                   | Ecuador<br>(1) | Loja/ Macará                         | AH        | 960          | 11.0                |
| <i>P. vulgaris</i>      | B     | Vulgaris      | G23582                   | Ecuador<br>(2) | Chimborazo/<br>Alausi                | AH        | 1710         | 8.4                 |
| <i>P. costaricensis</i> | B     | Vulgaris      | G40811A                  | Costa<br>Rica  | Cartago/ Cartago                     |           | 1510         | 18.8                |
| <i>P. dumosus</i>       | B     | Vulgaris      | G36043                   | Mexico         | Chiapas/ Ixtapa                      |           | 1680         | 70.3                |
| <i>P. coccineus</i>     | B     | Vulgaris      |                          | Mexico         | Querétaro/ La<br>Joya                |           | -            | -                   |
| <i>P. maculatus</i>     | B     | Polystachios  | PL-8841                  | Mexico         | -                                    | -         | -            | -                   |
| <i>P. polystachios</i>  | B     | Polystachios  | G40782                   | Mexico         | -                                    | -         |              | 8.4                 |
| <i>P. leptostachyus</i> | B     | Leptostachyus | PL-8829                  | Mexico         | -                                    | -         | -            | -                   |
| <i>P. filiformis</i>    | B     | Filiformis    | -                        | Mexico         | Baja California<br>Sur               | -         | -            | -                   |
| <i>P. lunatus</i>       | B     | Lunatus       | PL-8834                  | Mexico         | -                                    | -         | -            | -                   |
| <i>P. acutifolius</i>   | B     | Vulgaris      | -                        | Mexico         | Chiapas                              | -         | -            | -                   |
| <i>P. hintonii</i>      | A     | Tuerckheimii  | -                        | Mexico         | Edo. Mexico                          | -         | -            | -                   |
| <i>P. microcarpus</i>   | A     | -             | PL-8844                  | Mexico         | -                                    | -         | -            | -                   |

**Table S2.** Genome coverage.

| Group                       | Species                           | Reads (e <sup>6</sup> ) | Theoretical Coverage <sup>a</sup> | Depth of Coverage <sup>b</sup> | Breath of Coverage <sup>c</sup> |
|-----------------------------|-----------------------------------|-------------------------|-----------------------------------|--------------------------------|---------------------------------|
| <b>Vulgaris</b>             | <i>P. dumosus</i>                 | 359                     | 55.2x                             | 27.5x                          | 85%                             |
|                             | <i>P. costarricensis</i>          | 317                     | 48.8x                             | 29.4x                          | 87%                             |
|                             | <i>P. acutifolius</i>             | 242                     | 37.2x                             | 19.6x                          | 60%                             |
|                             | <i>P. coccineus</i>               | 285                     | 43.8x                             | 31.5x                          | 88%                             |
|                             | <i>P. vulgaris</i> (G24392)       | 90                      | 13.8x                             | 6.4x                           | 91%                             |
|                             | <i>P. vulgaris</i> (G24377)       | 142                     | 21.8x                             | 9.4x                           | 94%                             |
|                             | <i>P. vulgaris</i> (G50368)       | 91                      | 14.0x                             | 7.5x                           | 92%                             |
|                             | <i>P. vulgaris</i> (G23556)       | 170                     | 26.2x                             | 22.4x                          | 94%                             |
|                             | <i>P. vulgaris</i> (G23939)       | 129                     | 19.8x                             | 18.1x                          | 96%                             |
|                             | <i>P. vulgaris</i> (G23551)       | 173                     | 26.6x                             | 20.2x                          | 94%                             |
|                             | <i>P. vulgaris</i> (G12967)       | 155                     | 23.8x                             | 18.3x                          | 94%                             |
|                             | <i>P. vulgaris</i> (G23463)       | 198                     | 30.5x                             | 17.9x                          | 95%                             |
|                             | <i>P. vulgaris</i> (G23550)       | 121                     | 18.6x                             | 12.4x                          | 90%                             |
|                             | <i>P. vulgaris</i> (G24594)       | 342                     | 52.6x                             | 25.0x                          | 95%                             |
|                             | <i>P. vulgaris</i> (Faba Andecha) | 226                     | 34.8x                             | 28.6x                          | 93%                             |
|                             | <i>P. vulgaris</i> (G19901)       | 127                     | 19.5x                             | 14.1x                          | 93%                             |
|                             | <i>P. vulgaris</i> (G09603)       | 274                     | 42.2x                             | 36.6x                          | 98%                             |
|                             | <i>P. vulgaris</i> (G21244)       | 338                     | 52.0x                             | 48.6x                          | 92%                             |
|                             | <i>P. vulgaris</i> (G21245)       | 249                     | 38.3x                             | 34.3x                          | 92%                             |
|                             | <i>P. vulgaris</i> (G23587)       | 299                     | 46.1x                             | 37.4x                          | 93%                             |
| <i>P. vulgaris</i> (G23724) | 236                               | 36.3x                   | 15.7x                             | 67%                            |                                 |
| <i>P. vulgaris</i> (G23582) | 189                               | 29.1x                   | 17.9x                             | 92%                            |                                 |
| <b>Leptostachyus</b>        | <i>P. leptostachyus</i>           | 258                     | 39.7x                             | 22.0x                          | 77%                             |
| <b>Lunatus</b>              | <i>P. lunatus</i>                 | 200                     | 30.8x                             | 14.8x                          | 68%                             |
| <b>Polystachios</b>         | <i>P. polystachios</i>            | 293                     | 45.1x                             | 19.7x                          | 67%                             |
|                             | <i>P. maculatus</i>               | 192                     | 29.6x                             | 15.4x                          | 66%                             |
| <b>Filiformis</b>           | <i>P. filiformis</i>              | 131                     | 20.1x                             | 15.7x                          | 67%                             |
| <b>Tuerckhemii</b>          | <i>P. hintonii</i>                | 182                     | 28.0x                             | 11.8x                          | 59%                             |
| <b>ND</b>                   | <i>P. microcarpus</i>             | 190                     | 29.3x                             | 12.8x                          | 56%                             |

<sup>a</sup> Calculated over 650 Mb of theoretical genome length.

<sup>b</sup> Calculated over 556.4 Mb of BAT93 genome assembly.

<sup>c</sup> Calculated over the evelen synteny-based pseudo-assembled linkage groups after 'N' removal.

**Table S3.** SNPs detected in each chromosome.

|                                        | <b>Chr1</b> | <b>Chr2</b> | <b>Chr3</b> | <b>Chr4</b>  | <b>Chr5</b>  | <b>Chr6</b>       |
|----------------------------------------|-------------|-------------|-------------|--------------|--------------|-------------------|
| <b>Non-unique</b>                      | 705048      | 838484      | 823694      | 408724       | 457067       | 529841            |
| <b>Singlets</b>                        | 872548      | 1046891     | 1032868     | 477570       | 526394       | 685718            |
| <i>P. vulgaris/P. pseudovulgaris</i> * | 640791      | 715560      | 716878      | 470972       | 429492       | 417494            |
| <b>Total</b>                           | 1577596     | 1885375     | 1856562     | 886294       | 983461       | 1215559           |
|                                        | <b>Chr7</b> | <b>Chr8</b> | <b>Chr9</b> | <b>Chr10</b> | <b>Chr11</b> | <b>Not-mapped</b> |
| <b>Non-unique</b>                      | 716128      | 718638      | 681648      | 369035       | 486946       | 706142            |
| <b>Singlets</b>                        | 916047      | 845538      | 875554      | 434598       | 577532       | 1432169           |
| <i>P. vulgaris/P. pseudovulgaris</i> * | 585065      | 663907      | 548797      | 401460       | 498863       | -                 |
| <b>Total</b>                           | 1632175     | 1564176     | 1557202     | 803633       | 1064478      | 2138311           |

\*These SNPs present in *P. vulgaris* and *P. pseudovulgaris* were considered for the haplotype analyses in the domestication section.

Not-mapped column displays the number of SNPs called in contigs that were not assigned to any chromosomal position. These are mostly short contigs that do not reach the minimum number of CDSs to be placed in the pseudoassembly.

**Table S12.** Detected metabolites.

| Name                                                                                                       | m/z    | Ionization          | Exact Mass | Formula     | RT       | Ions               |
|------------------------------------------------------------------------------------------------------------|--------|---------------------|------------|-------------|----------|--------------------|
| Trigonelline                                                                                               | 138.05 | [M+H] <sup>+</sup>  | 138.0555   | C7H7NO2     | 0.33005  | 100 most abundant  |
| Threonine                                                                                                  | 120.07 | [M+H] <sup>+</sup>  | 120.0655   | C4H9NO3     | 1.00735  | 100 most important |
| 4-Methylumbelliferone                                                                                      | 177.05 | [M+H] <sup>+</sup>  | 177.0551   | C10H8O3     | 2.236917 | 100 most important |
| D-Sorbitol<br>6-phosphate                                                                                  | 263.05 | [M+H] <sup>+</sup>  | 263.0532   | C6H15O9P    | 0.3301   | 100 most important |
| Luteolin                                                                                                   | 287.04 | [M+H] <sup>+</sup>  | 287.0555   | C15H10O6    | 3.486033 | 100 most important |
| Kaempferol                                                                                                 | 287.04 | [M+H] <sup>+</sup>  | 287.055    | C15H10O6    | 3.295167 | 100 most important |
| Luteolin                                                                                                   | 287.04 | [M+H] <sup>+</sup>  | 287.0555   | C15H10O6    | 2.168317 | 100 most important |
| Kaempferol                                                                                                 | 287.04 | [M+H] <sup>+</sup>  | 287.055    | C15H10O6    | 5.202183 | 100 most important |
| Luteolin                                                                                                   | 287.04 | [M+H] <sup>+</sup>  | 287.0555   | C15H10O6    | 2.549283 | 100 most important |
| all-trans-Retinoic<br>acid                                                                                 | 301.20 | [M+H] <sup>+</sup>  | 301.2167   | C20H28O2    | 13.29615 | 100 most important |
| L-beta-Homotryptophan                                                                                      | 219.09 | [M+H] <sup>+</sup>  | 219.1133   | C12H14N2O2  | 2.63535  | 100 most intense   |
| Biotin                                                                                                     | 245.08 | [M+H] <sup>+</sup>  | 245.0954   | C10H16N2O3S | 2.5326   | 100 most intense   |
| Quercetin                                                                                                  | 303.03 | [M+H] <sup>+</sup>  | 303.0504   | C15H10O7    | 2.956717 | 100 most intense   |
| Myricetin                                                                                                  | 319.03 | [M+H] <sup>+</sup>  | 319.0449   | C15H10O8    | 2.236917 | 100 most intense   |
| alpha-Tocotrienol                                                                                          | 425.37 | [M+H] <sup>+</sup>  | 425.3419   | C29H44O2    | 10.24525 | 100 most intense   |
| Daidzin                                                                                                    | 439.12 | [M+Na] <sup>+</sup> | 439.0999   | C21H20O9    | 0.3301   | 100 most intense   |
| Kaempferol-7-<br>neohesperidoside; LC-ESI-<br>QTOF; MS2; [M+H] <sup>+</sup> ; CE                           | 595.15 | [M+H] <sup>+</sup>  | 595.1658   | C27H30O15   | 3.5719   | 100 most intense   |
| Pelargonin                                                                                                 | 595.16 | [M] <sup>+</sup>    | 595.1663   | C27H31O15   | 2.168317 | 100 most intense   |
| Isorhamnetin                                                                                               | 317.06 | [M+H] <sup>+</sup>  | 317.0656   | C16H12O7    | 3.676733 | 30 most important  |
| Coumarin                                                                                                   | 147.04 | [M+H] <sup>+</sup>  | 147.0441   | C9H6O2      | 2.549283 | whole profile      |
| D-Ala-D-ala                                                                                                | 161.09 | [M+H] <sup>+</sup>  | 161.0926   | C6H12N2O3   | 2.635258 | whole profile      |
| Umbelliferone                                                                                              | 163.03 | [M+H] <sup>+</sup>  | 163.039    | C9H6O3      | 14.83854 | whole profile      |
| DL-5-Hydroxylysine                                                                                         | 163.10 | [M+H] <sup>+</sup>  | 163.1082   | C6H14N2O3   | 4.542092 | whole profile      |
| Nicotine                                                                                                   | 163.14 | [M+H] <sup>+</sup>  | 163.1235   | C10H14N2    | 11.59702 | whole profile      |
| Chalcone                                                                                                   | 209.11 | [M+H] <sup>+</sup>  | 209.0966   | C15H12O     | 2.253883 | whole profile      |
| gamma-Glutamylleucine                                                                                      | 261.21 | [M+H] <sup>+</sup>  | 261.2      | C11H20N2O5  | 13.88493 | whole profile      |
| Genistein                                                                                                  | 271.05 | [M+H] <sup>+</sup>  | 271.0601   | C15H10O5    | 4.7327   | whole profile      |
| Cinchonine                                                                                                 | 295.18 | [M+H] <sup>+</sup>  | 295.1805   | C19H22N2O   | 14.45722 | whole profile      |
| Sinapoyl malate                                                                                            | 341.09 | [M+H] <sup>+</sup>  | 341.0872   | C15H16O9    | 3.016733 | whole profile      |
| gamma-Tocotrienol                                                                                          | 411.35 | [M+H] <sup>+</sup>  | 411.3263   | C28H42O2    | 17.04082 | whole profile      |
| Ononin                                                                                                     | 431.12 | [M+H] <sup>+</sup>  | 431.1337   | C22H22O9    | 3.016733 | whole profile      |
| Ideain                                                                                                     | 449.09 | [M] <sup>+</sup>    | 449.1078   | C21H21O11   | 2.549283 | whole profile      |
| Cyanidin-3-glucoside                                                                                       | 449.10 | [M] <sup>+</sup>    | 449.1084   | C21H21O11   | 2.168317 | whole profile      |
| Kaempferol-3-Glucuronide                                                                                   | 463.08 | [M+H] <sup>+</sup>  | 463.0876   | C21H18O12   | 3.31235  | whole profile      |
| Isoquercitrin                                                                                              | 465.09 | [M+H] <sup>+</sup>  | 465.1028   | C21H20O12   | 2.046483 | whole profile      |
| Hyperoside                                                                                                 | 465.09 | [M+H] <sup>+</sup>  | 465.1028   | C21H20O12   | 3.016733 | whole profile      |
| Quercetin-3-Glucuronide                                                                                    | 479.07 | [M+H] <sup>+</sup>  | 479.0826   | C21H18O13   | 2.91385  | whole profile      |
| Procyanidin B2                                                                                             | 579.16 | [M+H] <sup>+</sup>  | 579.1502   | C30H26O12   | 2.618217 | whole profile      |
| Cyanidin-3-O-(2"-O-beta-<br>xylopyranosyl-beta-<br>glucopyranoside)                                        | 581.17 | [M] <sup>+</sup>    | 581.1506   | C26H29O15   | 3.016733 | whole profile      |
| Reserpine                                                                                                  | 609.26 | [M+H] <sup>+</sup>  | 609.2806   | C33H40N2O9  | 13.4009  | whole profile      |
| Cyanidin-3,5-di-O-glucoside                                                                                | 611.15 | [M] <sup>+</sup>    | 611.1612   | C27H31O16   | 2.168317 | whole profile      |
| Rutin                                                                                                      | 611.15 | [M+H] <sup>+</sup>  | 611.1606   | C27H30O16   | 3.016733 | whole profile      |
| Kaempferol-3-O-rutinoside                                                                                  | 617.13 | [M+Na] <sup>+</sup> | 617.1477   | C27H30O15   | 3.5719   | whole profile      |
| Quercetin-3-O-alpha-L-<br>rhamnopyranosyl(1-2)-beta-D-<br>glucopyranoside-7-O-alpha-L-<br>rhamnopyranoside | 757.21 | [M+H] <sup>+</sup>  | 757.2191   | C33H40O20   | 2.168317 | whole profile      |

**Table S20.** Quantitative/morphological traits between *P. vulgaris* genotypes

| <b>Characters</b>                     | <b>Mesoamerica</b>      | <b>Amotape-Huancabamba</b> | <b>Andes</b>                      |
|---------------------------------------|-------------------------|----------------------------|-----------------------------------|
| Length of inflorescence peduncle (cm) | 32 cm                   | 1.0-4.0 cm                 | 5.0 cm                            |
| Number of floral nodes per infl.      | 7-10                    | 1-2                        | 4-8                               |
| Number of veins on bracteoles         | 7-10                    | 8                          | 5-6                               |
| Flower colour                         | Lavender, pink or white | Pink                       | Lavender, pink-purple (not white) |
| No. of seeds/pod                      | 8-10                    | 5-8                        | 5-8                               |
| Pod length (cm)                       | 6-8.3                   | 6-7.5                      | 4.5-10.0                          |
| Pod width (cm)                        | 0.5-1.0                 | 0.8-0.9                    | 0.6-1.0                           |
| 100 seed weight (gr)                  | 3.5-6.5                 | 7.1-11                     | 11.6-13.9                         |
| Seed length (mm)                      | 6-10.0                  | 7.0-8.0                    | 5.0-10.0                          |
| Seed width (mm)                       | 5-6                     | 4.5-5.5                    | 3.5-7.0                           |
| Hilum length (mm)                     | 1.0                     | 1.5 mm                     | 1.5-1.8                           |
