# Supplementary material for: Genomic history of the origin and domestication of common bean unveils its closest sister species
Source: PubMed Central journal article supplement (PMC5370463; doi:10.1186/s13059-017-1190-6), 2017-03-29
Supplement: 13059_2017_1190_MOESM3_ESM.pdf [file 13059_2017_1190_MOESM3_ESM.pdf]

# Genomic history of the origin and domestication of common bean unveils its closest sister species

Additional file 3

## Coalescent simulations

To obtain a temporal frame of the divergence between AH genotypes and the *P. vulgaris* clade, we conducted coalescent simulations using the Bayesian inference implemented in BEAST v.2.3.0 [68]. Three data sets from seven genotypes (*P. vulgaris* BAT93 and Jalo EEP558 as representative genotypes of the MA and Andean gene pools, respectively; one accession from Peru (G21245), *P. dumosus*, *P. costaricensis*, *P. coccineus* and *P. hintonii*) were considered: 150 random protein coding genes (PCGs) from the 11 linkage groups; 170 widespread single-copy orthologous PCGs that were used by Valsova *et al.* 2016 to produce the phylogenetic tree of 13 plant species; 55Kb of the chloroplast genome. XML files for the simulations were produced with BEAUTi v.2.3.0 with the following priors: GTR substitution model with estimated frequencies; Yule birth tree model; log normal uncorrelated relaxed clock with adjusted clock rates according to the data set (Tables S4, 5); monophyly of *P. vulgaris* BAT93/Jalo EEP558 and monophyly of *P. dumosus*/*P. costaricensis*.

The XML files were fed as input to BEAST, to perform 3 MCMC runs with 10,000,000 steps (log every 1000). Log and tree files were combined with LogCombiner v.2.3.0; the consensus trees were obtained with TreeAnnotator v.2.3.0 and drawn with FigTree v.1.4.2 for each case. Consensus trees and Tracer statistics are displayed in Figures S5-10 and Tables S6-11.

**Table S4.** Time and  $\mu$  priors considered for the chloroplast genome.

| Priors                      | Chloroplast genome |         |           |         |
|-----------------------------|--------------------|---------|-----------|---------|
|                             | 1                  |         | 2         |         |
| Clade                       | Time (MY)          | $\mu$   | Time (MY) | $\mu$   |
| A                           | -                  | -       | 3         | 1.13E-3 |
| Vulgaris (BAT93-JaloEEP558) | 0.165              | 8.14e-4 | -         | -       |
| Clock rate                  | -                  | 8.14e-4 | -         | 1.13E-3 |

**Table S5.** Time and  $\mu$  priors considered for the nuclear markers.

| Priors                               | Random PCGs |          |           |          | Orthologous PCGs |          |           |          |
|--------------------------------------|-------------|----------|-----------|----------|------------------|----------|-----------|----------|
|                                      | 1           |          | 2         |          | 3                |          | 4         |          |
| Clade                                | Time (MY)   | $\mu$    | Time (MY) | $\mu$    | Time (MY)        | $\mu$    | Time (MY) | $\mu$    |
| A/B                                  | 1           | 1.75E-2  | 5         | 3.5E-03  | 1.6              | 1.2E-2   | 3.5       | 5.1E-3   |
| A                                    | 0.7         | 1.1E-2   | 2.5       | 3.0E-03  | 1.8              | 4.7E-3   | 1.6       | 5.3E-3   |
| Vulgaris (BAT93-JaloEEP558)          | 0.165       | 3.03E-04 | 0.165     | 3.03E-04 | 0.165            | 3.03E-04 | 0.165     | 3.03E-04 |
| <i>P. vulgaris/P. pseudovulgaris</i> | -           | -        | 0.7       | 6.0E-03  | 0.7              | 6.20E-03 | 0.7       | 6.20E-03 |
| Clock rate                           | -           | 5.0E-3   | -         | 3.50E-03 | -                | 0.011    | -         | 5.1E-3   |

**Table S6.** Statistics derived from the combination of three MCMC runs using the chloroplast markers (time priors [1], Table S4).

| tMRCA                       | BAT93/Jalo       | <i>P. vulgaris</i> /<br><i>P.pseudovulgaris</i> | <i>P. dumosus</i> /<br><i>P.costaricensis</i> | Clade A          |
|-----------------------------|------------------|-------------------------------------------------|-----------------------------------------------|------------------|
| mean                        | 0.1711           | 0.9808                                          | 2.1804                                        | 3.8029           |
| stderr of mean              | 2.7663E-3        | 0.0117                                          | 0.0101                                        | 0.0153           |
| stdev                       | 0.3108           | 0.8779                                          | 0.6211                                        | 1.1571           |
| variance                    | 0.0966           | 0.7706                                          | 0.3858                                        | 1.3389           |
| median                      | 0.1548           | 0.922                                           | 2.1338                                        | 3.7525           |
| geometric mean              | 0.1563           | 0.9441                                          | 2.1477                                        | 3.7415           |
| 95% HPD Interval            | [0.0663, 0.2887] | [0.582, 1.4424]                                 | [1.5403, 2.9119]                              | [2.5401, 5.0339] |
| auto-correlation time (ACT) | 2139.4536        | 4765.0878                                       | 7209.8729                                     | 4710.2285        |
| effective sample size (ESS) | 12620.9795       | 5666.6323                                       | 3745.1423                                     | 5732.6306        |

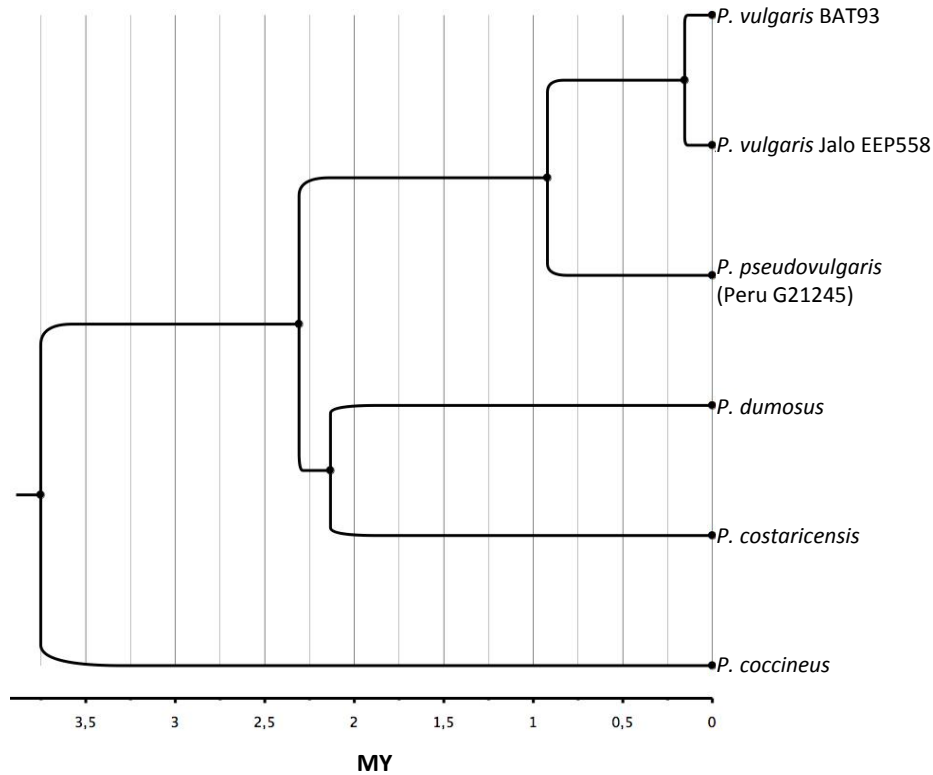

**Figure S5.** Consensus tree resulting from the combination of three MCMC runs using the chloroplast markers (time priors [1], Table S4).

**Table S7.** Statistics derived from the combination of three MCMC runs using the chloroplast markers (time priors [2], Table S4).

| tMRCA                       | BAT93/Jalo       | <i>P. vulgaris</i> /<br><i>P.pseudovulgaris</i> | <i>P. dumosus</i> /<br><i>P.costaricensis</i> | Clade A          |
|-----------------------------|------------------|-------------------------------------------------|-----------------------------------------------|------------------|
| mean                        | 0.1269           | 0.7021                                          | 1.5656                                        | 2.731            |
| stderr of mean              | 7.2413E-3        | 0.0114                                          | 4.7861E-3                                     | 0.0114           |
| stdev                       | 1.1871           | 1.5387                                          | 0.4613                                        | 1.497            |
| variance                    | 1.4092           | 2.3676                                          | 0.2128                                        | 2.2411           |
| median                      | 0.1112           | 0.6613                                          | 1.5318                                        | 2.6993           |
| geometric mean              | 0.1119           | 0.6725                                          | 1.5438                                        | 2.6841           |
| 95% HPD Interval            | [0.0484, 0.2062] | [0.423, 1.0038]                                 | [1.0849, 2.0854]                              | [1.8173, 3.6215] |
| auto-correlation time (ACT) | 1004.7639        | 1494.6592                                       | 2906.9868                                     | 1556.4576        |
| effective sample size (ESS) | 26873.9738       | 18065.6569                                      | 9288.6559                                     | 17348.3689       |

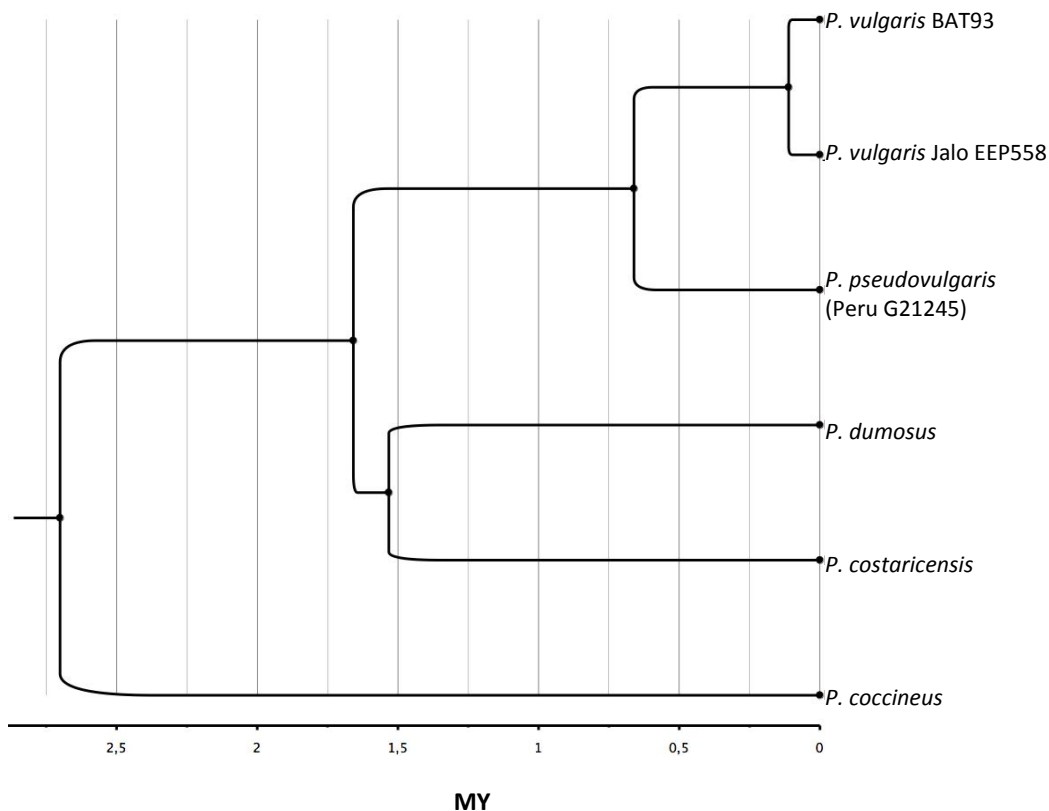

**Figure S6.** Consensus tree resulting from the combination of three MCMC runs using the chloroplast markers (time priors [2], Table S4).

**Table S8.** Statistics derived from the combination of three MCMC runs using the nuclear gene set of 150 random PCGs (time priors [1], Table S5).

| tMRCA                          | BAT93/Jalo                | <i>P. vulgaris</i> /<br><i>P.pseudovulgaris</i> | <i>P. dumosus</i> /<br><i>P.costaricensis</i> | Clade A             | Clades A/B         |
|--------------------------------|---------------------------|-------------------------------------------------|-----------------------------------------------|---------------------|--------------------|
| mean                           | 2.2794E-3                 | 0.2571                                          | 0.1302                                        | 0.4513              | 0.9691             |
| stderr of mean                 | 1.1064E-4                 | 6.6727E-3                                       | 1.6422E-3                                     | 4.1744E-3           | 0.0332             |
| stdev                          | 9.8066E-3                 | 0.2218                                          | 0.1126                                        | 0.3775              | 0.8387             |
| variance                       | 9.617E-5                  | 0.0492                                          | 0.0127                                        | 0.1425              | 0.7033             |
| median                         | 1.6321E-3                 | 0.1953                                          | 0.0981                                        | 0.3452              | 0.7324             |
| geometric mean                 | 1.6343E-3                 | 0.1935                                          | 0.0979                                        | 0.344               | 0.7278             |
| 95% HPD Interval               | [1.4643E-4,<br>5.9619E-3] | [0.0181, 0.6753]                                | [6.8602E-3,<br>0.3404]                        | [0.0356,<br>1.1651] | [0.067,<br>2.5336] |
| auto-correlation<br>time (ACT) | 3436.9495                 | 24446.7783                                      | 5741.4606                                     | 3302.2315           | 42269.8842         |
| effective sample<br>size (ESS) | 7856.6763                 | 1104.5627                                       | 4703.1587                                     | 8177.1977           | 638.8236           |

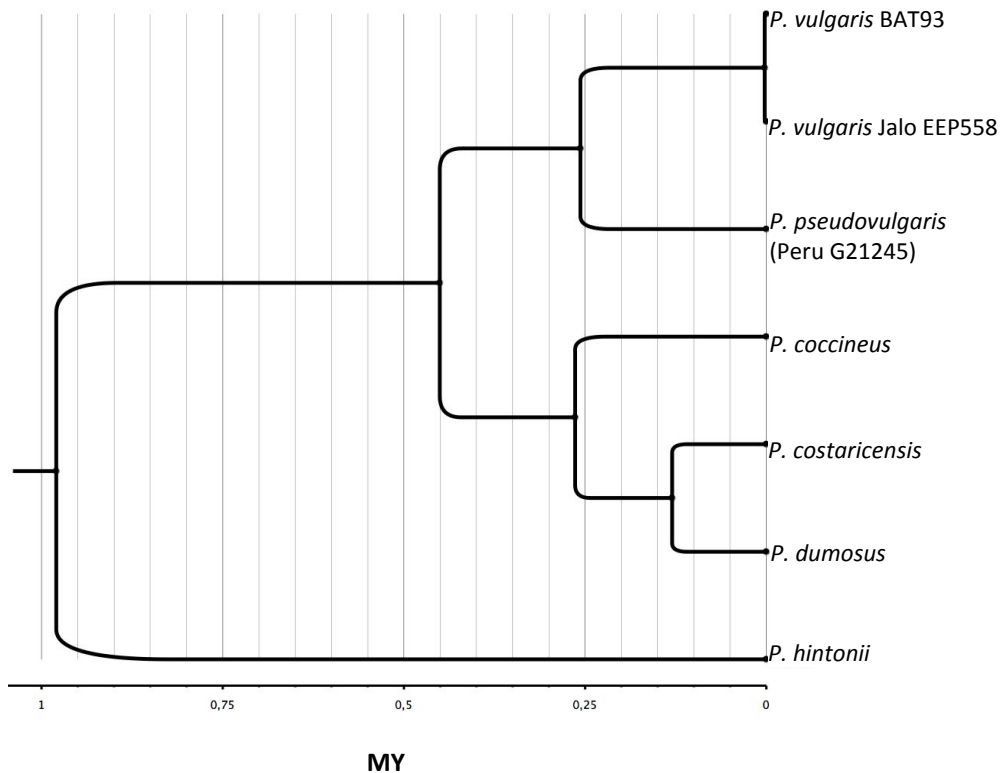

**Figure S7.** Consensus tree resulting from the combination of three MCMC runs using nuclear gene set of 150 random PCGs (time priors [1], Table S5).

**Table S9.** Statistics derived from the combination of three MCMC runs with the nuclear gene set of 150 random PCGs (time priors [2], Table S5).

| tMRCA                          | BAT93/Jalo                | <i>P. vulgaris</i> /<br><i>P. pseudovulgaris</i> | <i>P. dumosus</i> /<br><i>P. costaricensis</i> | Clade A             | Clades A/B         |
|--------------------------------|---------------------------|--------------------------------------------------|------------------------------------------------|---------------------|--------------------|
| mean                           | 1.8725E-3                 | 0.244                                            | 0.121                                          | 0.4259              | 0.9982             |
| stderr of mean                 | 2.8544E-5                 | 3.0918E-3                                        | 1.4402E-3                                      | 2.77E-3             | 0.0102             |
| stdev                          | 4.1243E-3                 | 0.174                                            | 0.0875                                         | 0.2982              | 0.7043             |
| variance                       | 1.701E-5                  | 0.0303                                           | 7.6479E-3                                      | 0.0889              | 0.496              |
| median                         | 1.4802E-3                 | 0.1987                                           | 0.098                                          | 0.3481              | 0.8164             |
| geometric mean                 | 1.4833E-3                 | 0.1989                                           | 0.0982                                         | 0.3491              | 0.8164             |
| 95% HPD Interval               | [2.1633E-4,<br>4.4264E-3] | [0.0309, 0.5773]                                 | [0.0157,<br>0.2866]                            | [0.0614,<br>0.9997] | [0.1357,<br>2.353] |
| auto-correlation time<br>(ACT) | 1293.435                  | 8524.293                                         | 7323.528                                       | 2330.6788           | 5624.228           |
| effective sample size<br>(ESS) | 20876.9667                | 3167.77                                          | 3687.1574                                      | 11585.8951          | 4801.1923          |

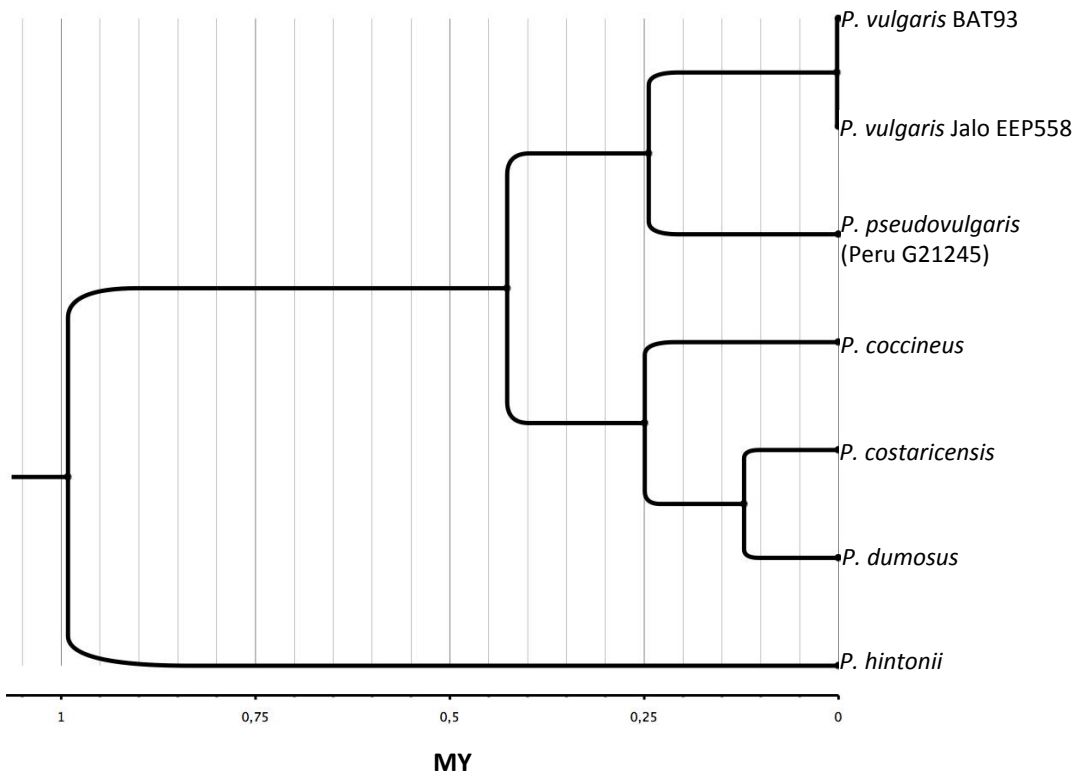

**Figure S8.** Consensus tree resulting from the combination of three MCMC runs using nuclear gene set of 150 random PCGs (time priors [2], Table S5).

**Table S10.** Statistics derived from the combination of three MCMC runs using the nuclear gene set of 170 orthologous PCGs (time priors [3], Table S5).

| tMRCA                          | BAT93/Jalo               | <i>P. vulgaris</i> /<br><i>P.pseudovulgaris</i> | <i>P. dumosus</i> /<br><i>P.costaricensis</i> | Clade A             | Clades A/B          |
|--------------------------------|--------------------------|-------------------------------------------------|-----------------------------------------------|---------------------|---------------------|
| mean                           | 2.0333E-3                | 0.2337                                          | 0.1352                                        | 0.4335              | 0.9672              |
| stderr of mean                 | 5.2135E-5                | 0.0108                                          | 6.1489E-3                                     | 2.7912E-3           | 0.0236              |
| stdev                          | 8.1384E-3                | 0.1682                                          | 0.099                                         | 0.3016              | 0.6813              |
| variance                       | 6.6234E-5                | 0.0283                                          | 9.7987E-3                                     | 0.091               | 0.4642              |
| median                         | 1.6089E-3                | 0.1905                                          | 0.1093                                        | 0.3554              | 0.7909              |
| geometric mean                 | 1.605E-3                 | 0.1894                                          | 0.109                                         | 0.3551              | 0.7893              |
| 95% HPD Interval               | [2.2032E-4,<br>4.723E-3] | [0.0312, 0.5632]                                | [0.0144,<br>0.3233]                           | [0.0534,<br>1.0088] | [0.1171,<br>2.2651] |
| auto-correlation time<br>(ACT) | 1108.155                 | 1.1047E5                                        | 1.042E5                                       | 2312.4709           | 32483.8748          |
| effective sample size<br>(ESS) | 24367.5305               | 244.4283                                        | 259.1577                                      | 11677.12            | 831.274             |

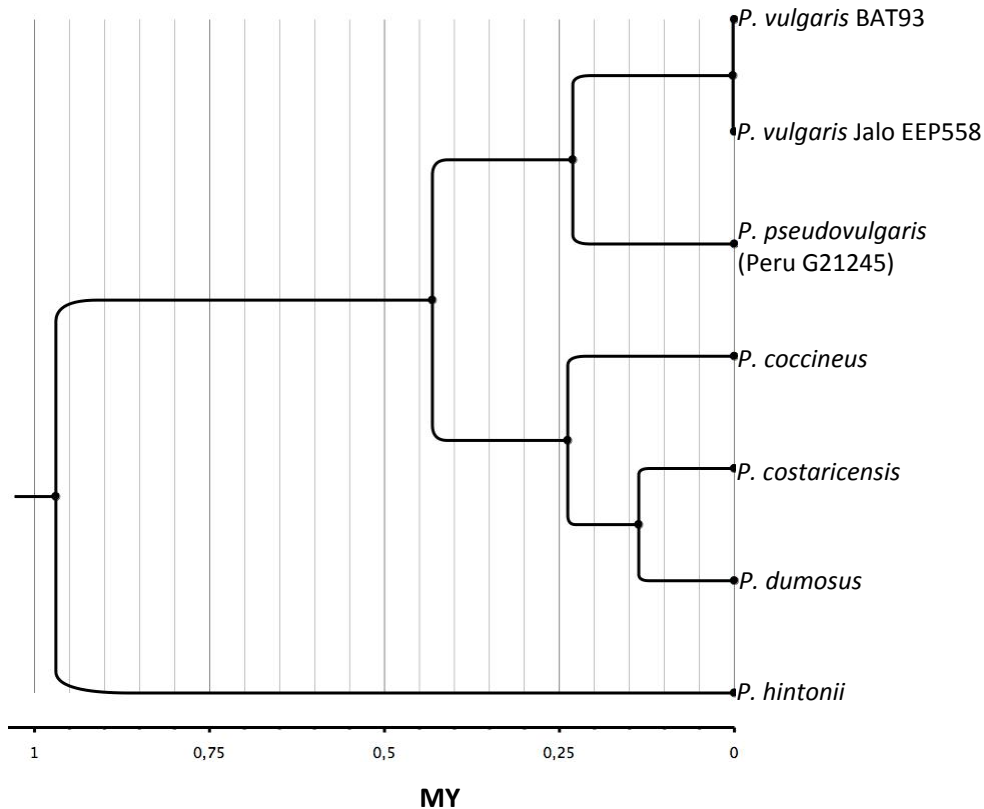

**Figure S9.** Consensus tree resulting from the combination of three MCMC runs using nuclear gene set of 170 orthologous PCGs (time priors [3], Table S5).

**Table S11.** Statistics derived from the combination of three MCMC runs with the nuclear gene set of 150 random PCGs (time priors [4], Table S5).

| tMRCA                          | BAT93/Jalo                | <i>P. vulgaris</i> /<br><i>P.pseudovulgaris</i> | <i>P. dumosus</i> /<br><i>P.costaricensis</i> | Clade A             | Clades A/B          |
|--------------------------------|---------------------------|-------------------------------------------------|-----------------------------------------------|---------------------|---------------------|
| mean                           | 2.0593E-3                 | 0.2265                                          | 0.145                                         | 0.4372              | 0.9987              |
| stderr of mean                 | 2.3018E-5                 | 4.7058E-3                                       | 3.1918E-3                                     | 3.3402E-3           | 0.053               |
| stdev                          | 2.2591E-3                 | 0.1613                                          | 0.1103                                        | 0.3082              | 0.7233              |
| variance                       | 5.1037E-6                 | 0.026                                           | 0.0122                                        | 0.095               | 0.5231              |
| median                         | 1.6545E-3                 | 0.1843                                          | 0.1176                                        | 0.3594              | 0.806               |
| geometric mean                 | 1.6545E-3                 | 0.1844                                          | 0.1175                                        | 0.3578              | 0.8074              |
| 95% HPD Interval               | [2.2953E-4,<br>4.9063E-3] | [0.0267, 0.5329]                                | [0.018,<br>0.3442]                            | [0.0517,<br>1.0233] | [0.1274,<br>2.3816] |
| auto-correlation time<br>(ACT) | 2803.2992                 | 22975.8216                                      | 22599.1929                                    | 3171.9187           | 1.4486E5            |
| effective sample size<br>(ESS) | 9632.5787                 | 1175.279                                        | 1194.8657                                     | 8513.1439           | 186.4043            |

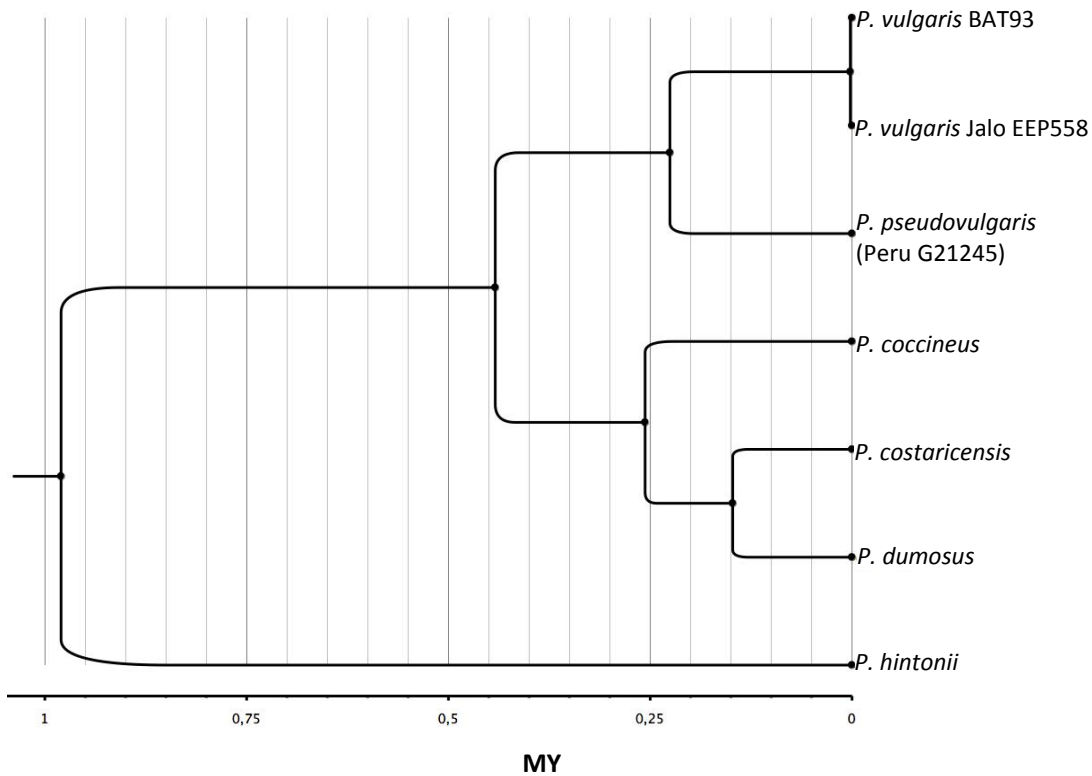

**Figure S10.** Consensus tree resulting from the combination of three MCMC runs using nuclear gene set of 170 orthologous PCGs (time priors [4], Table S5).
